# Supplementary material for: Modelling Clean Cooking and Climate Policy for Future Heart Disease Reduction
Source: Research Square preprint supplement (doi:10.21203/rs.3.rs-5796902/v1), 2025-01-22
Supplement: Supplementary file 1 [file 9e451c56750cb1c9d54a8ac9.docx]

**Supplementary Information**

**Modelling Clean Cooking and Climate Policy for Future Heart Disease Reduction**

*Eartha Weber1, Vassilis Daioglou1,2, Laszlo Vreedenburgh2, Jonathan Doelman 2,George Downward,*3,4, Maria Gabriela Matias de Pinho*1, Detlef van Vuuren*1,2*

**1 Copernicus Institute of Sustainable Development, Utrecht University, Utrecht, The Netherlands.**

**Email:** [**e.d.c.weber@uu.nl**](mailto:e.d.c.weber@uu.nl) **(corresponding author).**

**2**

**PBL Netherlands Environmental Assessment Agency, The Hague, The Netherlands**

**3**

**Department Population Health Sciences, Julius Center for Health Sciences and Primary Care,**

**4**

**Institute for Risk Assessment Sciences, Division of Environmental Epidemiology University Medical Center, Utrecht, The Netherlands**

**Contents**

**Appendix A: Underlying Model Assumptions for HOMES model**

**Appendix B: Data Sources for PAF Analysis and Future Population**

**Appendix C: IMAGE Modeling Framework Description**

**Full 26 Region Results Including Uncertainty Ranges**

**Sensitivity Analysis with Long Cook time**

**Supplementary Results:** SSP2 2015 Relative to SSP2 2050 PM2.5 Exposure Absolute Values

**Appendix A.**

**Table 1. Emission Rate Assumptions**

| **Fuel Types Categorized by TIMER** | **ISO VPT Assumption** | **Emission Rate** |
| --- | --- | --- |
| Coal | Tier 0 | 45 |
| Traditional Fuelwood (mixed) | Tier 1 | 45 |
| Improved Cookstove | Tier 2 | 21 |
| LPG | Tier 5 | 0.2 |
| Kerosene | Tier 4 | 2.7 |
| Natural Gas | Tier 5 | 0.2 |
| Biogas | Tier 4 | 2.7 |
| Electricity | Tier 5 | 0.2 |

**a** Due to the lack of research on Kerosene the WHO recommends avoiding it as the strength of some of its chemical constituents (independent of particle size) may be highly toxic, Emission rates interpreted into ISO VPT tiers were obtained from MacCarthy et al. 2020

**Table 2. Cooking Time Data Assumptions**

| **Assumption about cooking time length** | **Mean Cooking Time** | **Standard Deviation (mins/day)** | **Minimum Time**  **(mins/day)** | **Maximum Time**  **(mins/day)** | **Short Reference** |
| --- | --- | --- | --- | --- | --- |
| **Short** | 49.95 | **56.36** | **0** | 162 | (IPUMS MTUS, University of Minnesota, various high income regions**)** |
| **Long** | 259.2 | 85.2 | 73.2 | 401.4 | (WHO database of input variables, all regions- Africa, Americas, South-East Asia selected) |

For the short cooking time, time use data was analyzed from the IPUMS database the regions Austria (2008), Canada (2015), Italy (2008), Netherlands (2000), Bulgaria (2001), Finland (2009), Hungary (2009), France (2009), Italy (2008), Netherlands (2000), South Korea (2009), Spain (2002), and United Kingdom (2005) and United States (2015) based on the availability of cooktime based on time use diary data above the year 2000 and closest to the year 2015. Since the lower bound was in a negative number the minimum time was set at 0. The maximum was set at the mean plus 2 standard deviations in order to exclude outliers in the upper end of the dataset.

**Table 3. Kitchen Volume Data Assumptions**

| **Region** | **Mean**  **Kitchen Volume (m^3)** | **Standard Deviation** | **Minimum**  **volume** | **Maximum**  **volume** | **Short Reference** |
| --- | --- | --- | --- | --- | --- |
| All Regions | 30.7 | 15.38 | 13.38 | 60.57 | (WHO Database of Input Variables) |

For ease of analysis kitchen volume distribution was simulated by using the average of all regions available for the WHO database of input variables

**Table 4. Air Exchange Rate Data Assumptions**

| **Region** | **Mean**  **Air Exchange Rate (hr^-1)** | **Standard Deviation** | **Minimum** | **Maximum** | **Short Reference** |
| --- | --- | --- | --- | --- | --- |
| All Regions | 14.54 | 8.96 | 4.04 | 33.27 | (WHO Database of Input Variables) |

For ease of analysis air exchange rate distribution was simulated by using the average of all regions available for the WHO database of input variables

**Figure 1. Monte Carlo Distributions**

1. *Short Cooking Time Distribution*


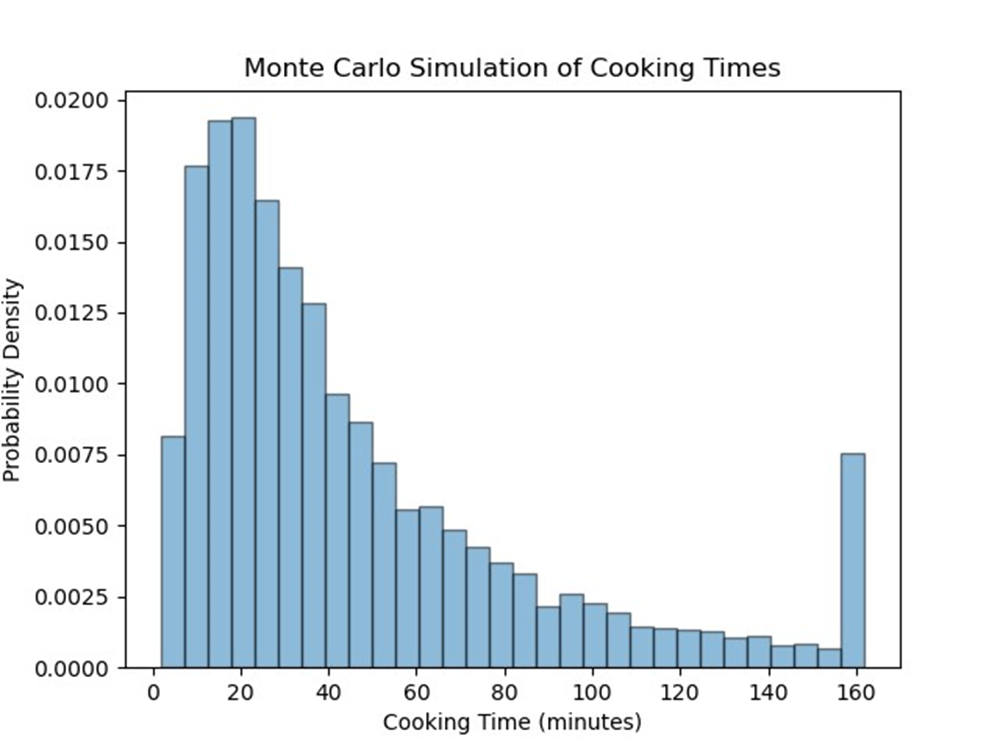


1. *Long Cooking Time Distribution (not shown in main figures)*


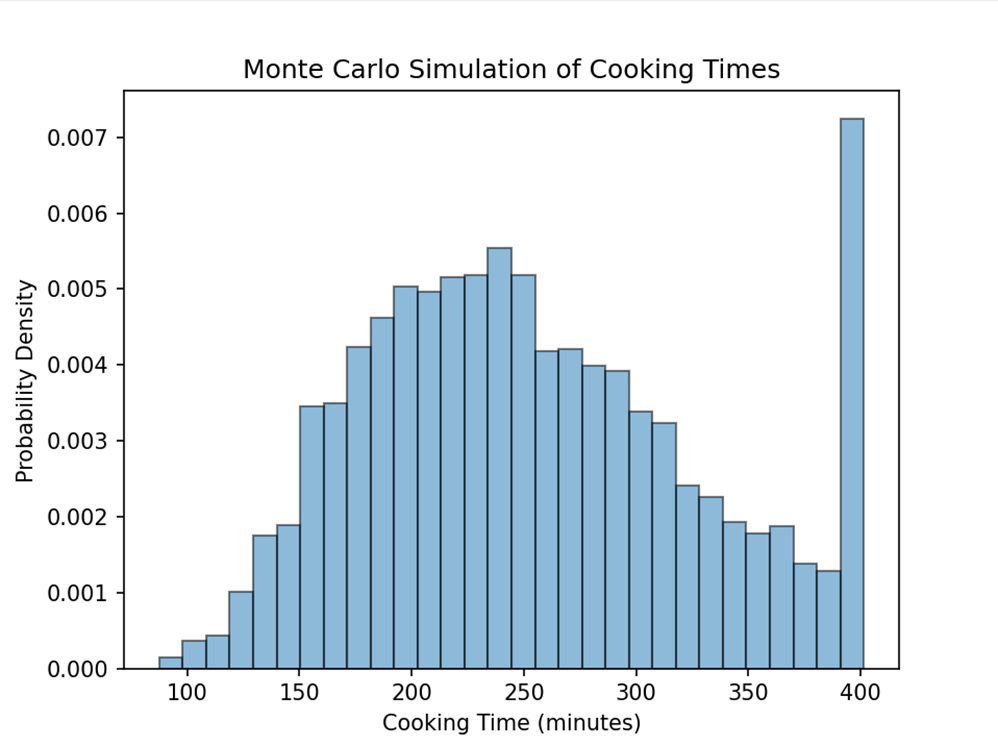


1. *Simulated Volumes Distribution (used in both long and short analyses)*


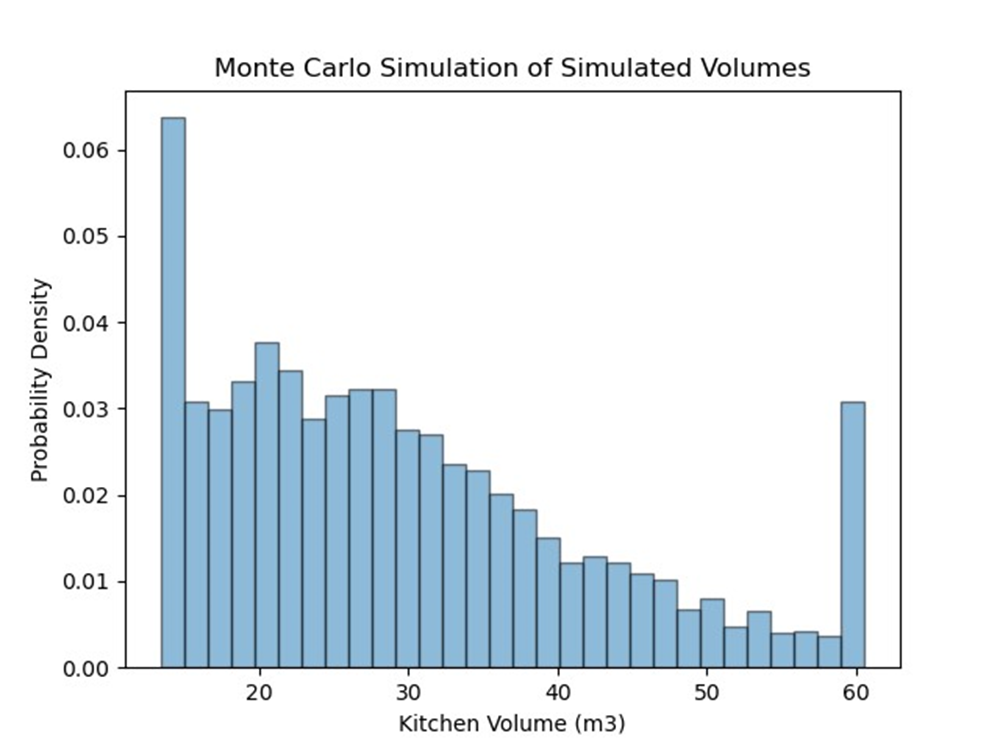


*D) Simulated Air Exchange Rate*


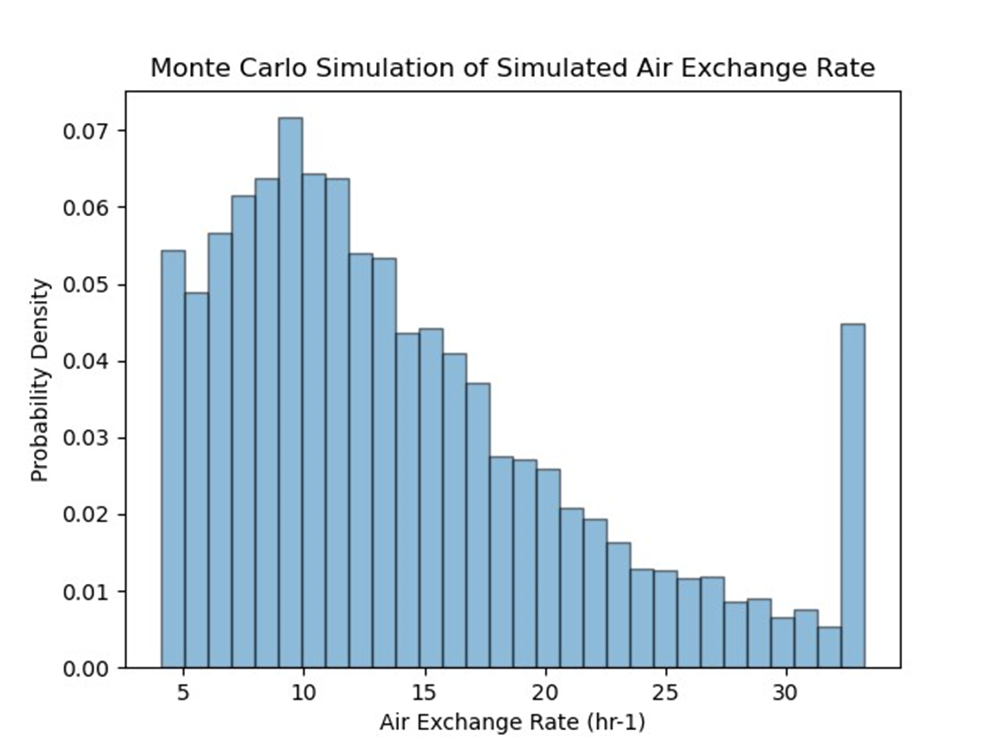


**Appendix B. Data Sources for PAF Analysis and Future Population**

| **Data** | **Description** | **Short Reference, Year** |
| --- | --- | --- |
| **Particulate Matter Risk Curves for GBD (2019) and TMREL Distribution** | Used to obtain the relative risks for each exposure by each 5 year age group. The TMREL is used in the PAF since minimum exposure to air pollution is not 0. | Global Burden of Disease Study, 20191 |
| **UN 2015 Population Data** | Used to weight the age calculated PAF’s by the proportion within the population that corresponded to that particular region. | World Population Prospects, 20222 |
| **SSP2 2030 and 2050 Population Data Projections** | Used to weight the age calculated PAF’s by the proportion within the population that corresponded to that particular region. Note that migration was not considered in our analysis. | IIASA,20243 |

1. Global Burden of Disease Collaborative Network. Global Burden of Disease Study 2019 (GBD 2019) Particulate Matter Risk Curves. Institute for Health Metrics and Evaluation (IHME) https://doi.org/10.6069/KHWH-2703 (2021).

2. Division, U. N. P. Home Page | Data Portal. *Population Division Data Portal* https://population.un.org/dataportal/home?df=943c739a-34f8-4a31-a807-e700a8c409b2.

3. POPULATION AND HUMAN CAPITAL PROJECTIONS (SSP 2023). *IIASA - International Institute for Applied Systems Analysis* https://iiasa.ac.at/models-tools-data/ssp-2023.

4. Gómez-Sanabria, A., Kiesewetter, G., Klimont, Z., Schoepp, W. & Haberl, H. Potential for future reductions of global GHG and air pollutants from circular waste management systems. *Nat. Commun.* **13**, 106 (2022).

**Appendix C. IMAGE Modeling Framework Description**

The IMAGE model is an integrated assessment model (IAM) which is a class of models used to explore the impact of human activities on the natural environment. Increasingly IAMs are being used to examine the impact of changes in the natural system on human health, well-being, and economic development. Variables such as population, policies, technological growth and economic growth are considered exogenous drivers. IMAGE specifically has components describing functional relationships between the Land use and Agricultural system and the Energy use system for 26 global regions. From these relationships emissions can be calculated which in turn influence the climate and atmospheric composition.

In general emissions of gases (CO2, CH4,N2O,SO2,NOX,CO,NMVOC,BC,OC,NH3) relevant for air pollution are calculated using the following approach:

Emission = Activityr,i *EF-baser,i *AF r,i

Where activity represents activities in the land or energy sector. R is the regional index, I is the sector or energy sector index, EF is the emission factor in baseline and AF is the abatement factor related to climate policy.

In this paper the specific sub-components of the IMAGE model used are: TIMER, REMG-TIMER, TM5-FAAST, and the LPJmL Global Dynamic Vegetation Model.

TIMER is a part of a model that describes the energy demand and supply system in IMAGE. In TIMER, climate mitigation policies are implemented through carbon taxes. The model then generates outputs related to energy efficiency investments, fossil fuel substitution, renewable energy investments. With an increased carbon tax, the TIMER model then increases the share of nuclear power, renewables, carbon capture and sequestration, energy efficiency and reducing other non-CO2 greenhouse gases. The REMG model is a component of the TIMER model, and it is a household energy demand model. The model utilizes drivers such as population, GDP, urbanization rates, value added and household expenditure to determine fuel choice. The fuel choices for the *‘SSP2 Baseline’* scenario was determined for the years 2030 and 2050. These choices were also assumed for ‘Mitigation’, ‘*End of Pipe’* and the ‘*Waste Reduction*’ scenario. Choices included coal, traditional fuel, LPG, improved cookstoves, kerosene, natural gas, biogas, and electricity. Choices were then grouped together according to ISO tier assumptions (See appendix A, Table 1). The proportions were then used to create a weighted average of the PM2.5 concentrations computed for each fuel type in the WHO HOMEs model.

The TM5-FAAST model converts precursor emissions calculated from the IMAGE model into population weighted yearly mean PM2.5 concentrations. First into 56 regions and then to 26 IMAGE regions. The LPJmL model was used to determine the impact of agricultural waste burning reduction on emissions. Grid-specific emissions were calculated from gridded activity levels.

For more in-depth information about the IMAGE model refer to the following reference:

Integrated Assessment of Global Environmental Change with IMAGE 3.0 - Model description and policy applications | PBL Netherlands Environmental Assessment Agency. <https://www.pbl.nl/en/publications/integrated-assessment-of-global-environmental-change-with-image-30-model-description-and-policy-applications> (2014).

## **Full 26 IMAGE Region Results Including Uncertainty Intervals (For Short Cooking Time Distribution)**

**The Estimated Global Burden (PAF) of Ischemic Heart Disease attributable to total PM2.5 air pollution from both ambient and household sources for the years 2030 and 2050 by scenario**

# **Table 1. ‘SSP2 Baseline’ With Short Cooking Times Over Time**

| **Scenario** |  | **Region** | **Both Sexes** | | | | | |
| --- | --- | --- | --- | --- | --- | --- | --- | --- |
| **PAF (%) (UR)** | | | **Percent change** | | |
| **Baseline (2015)** | **2030** | **2050** | **2015-2030** | **2030-2050** | **2015–2050** |
| SSP2 (Baseline) |  | Canada | 7.8  (6.7,9.1) | 2.5  (1.5,3.6) | 2.3  (1.1,3.4) | -67.9  (-77.6, -60.4) | -11.2  (-20, -5) | -71.2  (-82.3, -62.7) |
| USA | 10.5  (8.8,12.6) | 5.2  (4.1,6.6) | 5.2  (4.0,6.5) | -50.5  (-53.4, -47.6) | -12.9(-11.3-, -13.22) | -51.0  (-54.3,-48.4) |
| Mexico | 18.3  (15.7,  20.9) | 15.2 (13.6,  16.7) | 14.4 (12.7,16.3) | −16.9  (-13.4,-20.1) | -4.8  (-7.7,-2.5) | -21.0  (-19.3,-22.1) |
| Central America | 36.5  (34.1,  39.2) | 23.6 (22.1,  25.2) | 15.5 (14.2,16.9) | −35.3  (-58.4,-56.9) | -34.2  (-35.6,-33.2) | -57.4  (-58.2,-57.0) |
| Brazil | 26.6  (24.8,28.6) | 18.2 (16.9,19.6) | 9.7  (8.4,11.3) | −31.6  (-31.9,-31.5) | -46.3  (-50.3,-42.5) | -63.4  (-66.1,-60.6) |
| Rest of South America | 20.2  (18.2,22.4) | 15.8  (14.2,17.4) | 15.4  (13.7,17.2) | −21.8  (-22.0,-22.3) | -2.2  (-2.9,-1.3) | -23.8  (-24.5,  -23.2) |
| Northern Africa | 28.6  (25.9,31.4) | 21.7 (19.8,23.9) | 22.6 (20.7,24.7) | −24.1  (-23.6,-23.9) | 3.9  (4.6,3.3) | -21.1  (-20.3,-21.7) |
| Western Africa | 45.8  (42.4,49.3) | 37.8 (35.6,40.2) | 32.3 (30.7,33.8) | −17.5  (-16.0,-18.5) | -14.7  (-13.7-,  -15.9) | -29.7  (-27.6,-31.5) |
| Eastern Africa | 44.3  (41.05,47.6) | 34.6  (32.5,36.7) | 30.7  (29.1,32.2) | −21.9  (-20.8,-22.9) | -11.2  (-10.5,-12.1) | -30.8  (-29.1,  -32.2) |
| South Africa | 35.6  (33.1,38.0) | 23.6 (22.1,25.1) | 9.7  (8.5,11.0) | −33.7  (-33.2,  -33.9) | -59.1  (-61.6-,  -56.2) | -72.9  (-74.3,-71.1) |
| Western Europe | 15.8  (13.73,  18.0) | 9.5  (7.9,11.2) | 9.3  (7.8,10.9) | −39.9  (-42.5,-37.8) | -2.2  (-2.4 -,  -2.4) | -41.1  (-43.4,-39.3) |
| Central Europe | 17.3  (15.3,19.2) | 12.0 (10.6,13.5) | 8.4  (7.0,9.8) | −30.6  (-30.7,-29.7) | -30.2  (-33.6,-27.0) | -51.5  (-53.9,  -48.9) |
| Turkey | 28.4  (26.4,30) | 12.2  (10.6,14.0) | 12.7  (11.1,14.5) | −57.0  (-59.8,-27.1) | 4.1  (4.5,3.9) | -55.3  (-58.0, -52.4) |
| Ukraine Region | 28.4  (26.5,30.2) | 10.4  (9.2,11.7) | 6.1  (4.8,7.6) | -63.4  (-65.2,  -61.3) | -40.9  (-48.03,  -34.8) | -78.3  (-81.9, -74.9) |
| Central Asia | 26.6(23.9,29.6) | 23.4(21.3,25.5) | 23.1(21.0,25.1) | -12.0  (-10.9,-13.9) | -1.3(-1.3, -1.4) | -13.6  (-12.2, -15.1) |
| Russia Region | 8.8  (7.3,10.6) | 5.1  (3.8,6.5) | 4.3  (3.1,5.6) | −42.1  (-47.9,-38.7) | -15.7  (-18.3-,  -13.9) | -51.7  (-56.6, -47.7) |
| Middle East | 31.3(28.5,34.7) | 24.3(22.2,26.7) | 24.4(22.4,26.7) | −22.4  (-22.1,-23.1) | 0.29  (0.58-0.02) | -22.2 (-21.5, -23.2) |
| India | 41.7  (39.3,44.0) | 35.1  (33.6,36.5) | 32.3  (30.7,33.9) | -22.5  (-14.5, -17.0) | -8.0(-8.6, -7.1) | -22.6  (-21.9, -23.1) |
| Korea Region | 26.7  (24.3,29.3) | 19.7  (17.8,21.8) | 16.1  (14.3,18.2) | -39.7  (-26.7, -25.6) | -18.0(-19.2, -16.5) | -39.7  (-41.1, -37.9) |
| China Region | 40.6  (38.6,42.5) | 31.7  (30.1,33.2) | 24.9  (23.2,26.7) | -63.1  (-22.0,-21.9) | -21.2  (-23.08,-19.4) | -38.6  (-40.0, -37.1) |
| Southeastern Asia | 43.2  (40.3,45.8) | 31.1 (29.5,32.8) | 23.7(22.3,25.1) | -45.1  (-26.8, -28.4) | -24.0(-24.3,-23.5) | -45.3  (-44.7,  -45.3) |
| Indonesian Region | 36.9  (34.2,39.3) | 28.1 (26.3,29.7) | 22.1  (20.5,23.6) | -40.1  (-23.1,  -24.4) | -21.3  (-21.8,-20.6) | -40.2  (-40.0, -40.0) |
| Japan | 15.9  (13.8,18.0) | 9.3  (7.8,10.8) | 7.4  (6.0,8.8) | -41.5  (-43.5, -40.0) | -19.9  (-22.0, -18.3) | -53.4  (-56.2, -51.1) |
| Oceania | 5.9  (4.7,7.5) | 3.8  (2.8,5.1) | 3.7  (2.6,5.0) | -3.6  (-40.4, -32.0) | -0.03(-0.05, -0.91) | -38.1  (-44.6,-33.3) |
| Rest of South Asia | 42.1  (39.4,44.6) | 33.0  (31.5,34.6) | 30.6  (28.9,32.3) | -21.6  (-20.1, -22.4) | -7.4  (-8.4, -6.6) | -27.3  (-26.6, -27.6) |
| Rest of Southern Africa | 43.7(40.4,46.7) | 37.0 (34.6,39.4) | 29.6(27.6,31.5) | -15.3  (-14.4, -15.6) | -20.2(-20.4-, -19.9) | -32.4  (-31.8,  -32.5) |

# **Table 2. ‘Clean Cooking’ With Short Cooking Times Over Time**

| **Scenario** |  | **Region** | **Both sexes** | | | | | |
| --- | --- | --- | --- | --- | --- | --- | --- | --- |
| **PAF (%) (UR)** | | | **Percent change (UR)** | | |
| **2015** | **2030** | **2050** | **2015-2030** | **2030-2050** | **2015–2050** |
| SSP2 with Clean Energy Access | Cardiovascular Disease Population Attribuable Fraction | Canada | 7.8(6.7,9.1) | 1.5 (0.4 ,2.6) | 2.3 (1.2, 3.4) | -80.7  (-94.0,-71.4) | 48.3  ( 200, 29.7) | -71.4 (-82.6,  -62.9) |
| USA | 10.5(8.8,12.6) | 5.2 (4.0,6.6) | 5.2 (4.0,6.5) | -50.6  (-54.0,-47.9) | -1.1  (-0.8,-1.2) | -51.1 (-54.4,-48.5) |
| Mexico | 18.3(15.7,20.9) | 11.8 (10.1,13.5) | 14.4 (12.7,16.3) | -35.6 (-35.7,-35.4) | 22.5 (25.4-20.7) | -21.0 (-19.3,-22.1) |
| Central America | 36.5 (34.1, 39.2) | 9.4 (7.9, 11.1) | 9.3 (7.8, 10.9) | -74.1 (-76.9,-71.7) | -1.4  (-0.8,-1.6) | -74.5 (-77.1,-72.1) |
| Brazil | 26.6 (24.8, 28.6) | 9.7 (8.2, 11.5) | 8.4 (7.0, 10.1) | -63.5  (-67.1,-59.7) | -13.3 (-14.2,-12.3) | -68.4 (-71.8,-64.7) |
| Rest of South America | 20.2 (18.2, 22.4) | 14.5 (12.8, 16.3) | 15.2 (13.5,  17.0) | -28.3 (-29.7,-27.1) | 4.9 (5.6-4.3) | -24.8 (-25.7,-24.0) |
| Northern Africa | 28.6  (25.9,31.4) | 21.7 (19.8,  23.9) | 22.3 (20.7,  24.7) | -24.03 (-23.8,-24.2) | 3.9 (4.6-3.3) | -21.1 (-20.3,-21.7) |
| Western Africa | 45.8  (42.4,49.3) | 26.6 (24.4,  29.0) | 26.4 (24.2,  28.8) | -42.1 (-42.6,-41.4) | -0.6 (-0.5,-0.7) | -42.5  (-43.0,-41.8) |
| Eastern Africa | 44.3  (41.05,  47.6) | 15.1 (13.2,  17.1) | 26.5 (24.4,  28.6) | -66.1 (-67.9,-64.1) | 75.9 (85.3,  67.5) | -40.3 (-40.5,-40.0) |
| South Africa | 35.6  (33.1,38.0) | 8.1 (6.7,  9.7) | 6.9 (5.6,  8.4) | -77.2 (-79.6,-74.6) | -15.0 (-17.0,-13.3) | -80.6 (-83.1,-77.9) |
| Western Europe | 15.8(13.73,18.0) | 9.4 (7.8,11.1) | 9.3 (7.7, 10.9) | -40.4 (-42.9,-38.4) | -1.6 (-1.5,-1.8) | -41.4 (-43.8,-39.5) |
| Central Europe | 17.3(15.3, 19.2) | 10.7 (9.2, 12.3) | 8.3 (6.9, 9.7) | -37.9 (-39.9,-35.8) | -23.0 (-24.8,-21.1) | -52.2 (-54.8,-49.4) |
| Turkey | 28.4(26.4,  30.0) | 11.9 (10.3,  13.7) | 12.7 (11.1, 14.5) | -58.3 (-61.2,-55.1) | 7.1 (8.1,6.0) | -55.3 (-58.1,-52.4) |
| Ukraine Region | 28.4(26.5, 30.2) | 6.4 (4.9, 7.8) | 6.1 (4.7, 7.6) | -77.7 (-81.4,-74.1) | -3.6 (-3.8,-3.4) | -78.5 (-82.1,-74.9) |
| Central Asia | 26.6  (23.9,29.6) | 23.4 (21.3,25.5) | 23.1 (21.0,25.1) | -12.4 (-11.0,-13.9) | -1.3 (-1.3,-1.4) | -13.6 (-12.2,-15.1) |
| Russia Region | 8.8(7.3, 10.6) | 5.1 (3.9, 6.5) | 4.3 (3.2, 5.6) | -42.7 (-47.0,-39.2) | -15.8 (-18.3,-14.0) | -51.7 (-56.7,-47.7) |
| Middle East | 31.3(28.5, 34.7) | 24.3 (22.3, 26.7) | 24.4 (22.4, 26.7) | -22.4 (-22.0,-23.3) | 0.3 (0.5-0) | -22.2 (-21.5,-23.2) |
| India | 41.7(39.3,44.0) | 31.8 (29.8,33.6) | 31.4 (29.5,33.3) | -23.8 (-24.2,-23.8) | -1 (-1.1,-0.9) | -24.6 (-25.1,-24.5) |
| Korea Region | 26.7(24.3, 29.3) | 19.5 (17.5,21.7) | 16.13 (14.3,18.2) | -27.3 (-28.3,-26.1) | -17.1 (-18.1,-16.0) | -39.8 (-41.3,-37.9) |
| China Region | 40.6(38.6,42.5) | 29.6 (27.6,31.4) | 24.0 (22.0,25.9) | -27.2 (-28.6,-25.9) | -18.9 (-20.2,-17.6) | -40.9 (-43.0,-39.0) |
| Southeastern Asia | 43.2(40.3,45.8) | 18.0 (16.0,20.0) | 17.0 (15.1,19.0) | -58.4 (-60.3,-56.3) | -5.3 (-5.7,-5.1) | -60.6  (-62.5,-58.5) |
| Indonesian Region | 36.9(34.2,39.3) | 13.2 (11.4,15.3) | 15.8 (13.9,18.0) | -64.3 (-66.8,-61.0) | 20.0 (22.2,17.4) | -57.1 (-59.4, -52.2) |
| Japan | 15.9(13.8, 18.0) | 9.3 (7.8, 10.8) | 7.4 (6.1,8.8) | -41.8 (-43.8,-40.1) | -20.0 (-22.0,-18.3) | -53.4 (-56.2,  -51.1) |
| Oceania | 5.9(4.7, 7.5) | 3.3 (2.2, 4.6) | 3.7 (2.6, 5.0) | -45.3 (-54.0,-39.1) | 12.1 (18.3,9.0) | -38.7 (-45.5,-33.6) |
| Rest of South Asia | 42.1(39.4, 44.6) | 30 (28.0, 32.1) | 29.6 (27.6, 31.6) | -28.6 (-28.9,-28.1) | -1.6 (-1.4,-1.5) | -29.7(-29.9,-29.2) |
| Rest of Southern Africa | 43.7(40.4, 46.7) | 3.9 (2.7, 5.3) | 6.8 (5.4, 8.4) | -91.0 (-93.3,-88.7) | 72.0 (97.3,  59.5) | -84.5 (-86.7,-81.9) |

# **Table 3. Mitigation With Short Cooking Times Over Time**

| **Scenario** |  | **Region** | **Both sexes** | | | | | |
| --- | --- | --- | --- | --- | --- | --- | --- | --- |
| **PAF (%) (UR)** | | | **Percent change (UR)** | | |
| **Baseline 2015** | **2030** | **2050** | **2015-2030** | **2030-2050** | **2015–2050** |
| Mitigation 1.5 Scenario With SSP2 Energy Access Regardless of Type | Cardiovascular Disease Attributable to Air Pollution | Canada | 7.8  (6.7,9.1) | 2.2  (1.1,3.2) | 2.6  (1.5,3.7) | -71.9  (-83.0,  -64.8) | 15.5  (30.7,15.2) | -67.5  (-77.8,-59.4) |
| USA | 10.5(8.8,12.6) | 4.7 (3.6,6.0) | 5.7 (4.5,7.1) | -55.6  (-59.7,-52.3) | 21.2  (26.9-17.2) | -46.2  (-48.8,-44.1) |
| Mexico | 18.3(15.7,20.9) | 14.2 (12.8,15.7) | 9.4 (7.9,11.1) | -22.5 (-18.7,-25.2) | -33.5  (-38.2, -29.4) | -48.5  (-49.7,-46.2) |
| Central America | 36.5 (34.1,39.2) | 23.2 (21.6,24.7) | 13.8 (12.6,15.0) | -36.6 (-36.5,-36.9) | -40.4  (-41.9,  -39.2) | -62.2  (-63.1,-61.6) |
| Brazil | 26.6 (24.8, 28.6) | 16.4 (15.2,17.8) | 8.0 (6.8,9.4) | -38.4 (-38.6, -37.9) | -51.2  (-55.3,-46.9) | -70.0  (-72.6,  -67.1) |
| Rest of South America | 20.2 (18.2, 22.4) | 12.0 (10.6,13.5) | 7.9 (6.6, 9.4) | -40.5 (-41.9,-39.6) | -34.3  (-37.7,  -30.6) | -60.9  (-63.8,-58.1) |
| Northern Africa | 28.6  (25.9, 31.4) | 21.1 (19.2,23.3) | 22.6  (20.7,24.7) | -26.2(-26.2,-26.2) | 7.0  (8.0-6.0) | -21.1  (-20.3,-21.7) |
| Western Africa | 45.8(42.4,49.3) | 37.5 (35.3,39.8) | 30.5 (29.0,32.1) | -18.3 (-17.0,-19.4) | -18.5  (-17.7,  -19.2) | -33.4  (-31.7,  -34.9) |
| Eastern Africa | 44.3(41.05,47.6) | 34.2 (32.1,36.3) | 23.6 (21.9,25.2) | -23.0 (-21.7,-23.8) | -31.0  (-31.6,  -30.7) | -46.8  (-46.4,-47.2) |
| South Africa | 35.6(33.1,38.0) | 23.1 (21.6,24.6) | 7.4 (6.4,8.6) | -35.1 (-34.7,-35.3) | -68.8  (-70.5,  -65.0) | -79.1  (-80.7,  -77.4) |
| Western Europe | 15.8(13.73,18.0) | 8.3 (6.8,9.9) | 9.3 (7.8,10.9) | -47.5 (-50.3,-45.1) | 12.2  (13.7,  10.6) | -41.1  (-43.4,-39.3) |
| Central Europe | 17.3(15.3,19.2) | 11 (9.6,12.4) | 7.0(5.8,8.4) | -36.3 (-37.0,-35.5) | -36.2  (-40.0,  -32.4) | -59.4  (-62.2,-56.4) |
| Turkey | 28.4(26.4,30.0) | 10 (8.6,11.6) | 9.5 (8.1,11.1) | -64.8  (-67.5,-61.9) | -4.8  (-5.6,  -3.9) | -66.5  (-69.3,  -63.4) |
| Ukraine Region | 28.4(26.5,30.2) | 8.9 (7.8,10.0) | 3.2 (2.0,4.4) | -68.8 (-70.8,-70.0) | -64.2  (-74.2,  -55.7) | -88.8  (-92.5,-85.4) |
| Central Asia | 26.6(23.9,29.6) | 21.5 (19.4,23.6) | 20.6 (18.5, 22.6) | -19.4 (-18.8,-20.2) | -4.4  (-4.7,-4.3) | -23.0  (-22.6,-23.6) |
| Russia Region | 8.8(7.3,10.6) | 3.5 (2.3,4.7) | 2.5 (1.3, 3.6) | -60.8 (-68.3,-55.7) | -28.0  (-41.5,  -23.1) | -71.8  (-81.4,-65.9) |
| Middle East | 31.3(28.5, 34.7) | 22.7 (20.7, 25.0) | 22.3 (20.3, 24.6) | -27.5 (-27.5,-28.0) | -1.7  (-1.7,-1.8) | -28.8  (-28.7,-29.3) |
| India | 41.7(39.3, 44.0) | 33.4 (31.8, 34.9) | 26.1 (24.4, 27.7) | -19.9 (-19.1,-20.7) | -21.9  (-23.3, -20.8) | -37.4  (-37.9,-37.1) |
| Korea Region | 26.7(24.3, 29.3) | 17.47 (15.57, 19.6) | 11.6  (10.0, 13.4) | -34.8 (-36.0,-33.2) | -33.7  (-36.1,  -31.5) | -56.8  (-59.1,-54.2) |
| China Region | 40.6(38.6, 42.5) | 29.11 (27.6, 30.6) | 18.9 (17.3, 20.6) | -28.4 (-28.5,-28.0) | -35.0  (-37.5,  -32.6) | -53.4  (-55.4,-51.4) |
| Southeastern Asia | 43.2(40.3, 45.8) | 30.3 (28.7,  31.92) | 20.9 (19.6, 22.2) | -29.9 (-28.9,-30.4) | -31.0  (-31.5,  -30.4) | -51.6  (-51.3,-51.5) |
| Indonesian Region | 36.9(34.2,39.3) | 27.2 (25.44,28.9) | 18.8 (17.4, 20.2) | -26.2 (-25.7,-26.5) | -31.1  (-31.7,-30.2) | -49.2  (-49.2,  -48.7) |
| Japan | 15.9(13.8,18.0) | 8.0 (6.6, 9.4) | 5.7 (4.5, 7.0) | -49.8 (-52.4,-47.5) | -29.0  (-32.2,-26.1) | -64.3  (-67.7,-61.2) |
| Oceania | 5.9(4.7,7.5) | 3.9 (2.9, 5.2) | 4.1 (3.1, 5.5) | -34.1 (-39.1,-30.6) | 4.6  (5.1,4.6) | -31.1  (-36.0,-27.4) |
| Rest of South Asia | 42.1(39.4, 44.6) | 31.1 (29.5, 32.6) | 25.7 (23.9, 27.5) | -26.2 (-25.0,-26.8) | -17.3  (-19.0,-15.8) | -38.9  (-39.2,-38.3) |
| Rest of Southern Africa | 43.7(40.4,  46.7) | 37.0 (34.6, 39.4) | 28.7 (26.7, 30.6) | -15.3 (-14.4,-15.8) | -22.5  (-22.9,  -22.1) | -34.4  (-34.0,-34.4) |

**Table 4. ‘Clean Mitigation’ (Mitigation and Clean Energy Access) With Short Cooking Times Over Time**

| **Scenario** |  | **Region** | **Both sexes** | | | | | |
| --- | --- | --- | --- | --- | --- | --- | --- | --- |
| **PAF (%) (UR)** | | | **Percent change (UR)** | | |
| **2015** | **2030** | **2050** | **2015-2030** | **2030-2050** | **2015–2050** |
| Canada | 7.8(6.7, 9.1) | 1.2  (0.0,2.3) | 2.5  (1.5,3.7) | -84.7  (-98.8,-75.0) | 111.2  (1702.7-62.2) | -67.7  (-77.9,-59.5) |
| USA | 10.5(8.8,12.6) | 4.7  (3.5,6.0) | 5.7  (4.5,7.0) | -55.6  (-59.7,-52.4) | 21.3  (27.1,17.3) | -46.2  (-48.8,-44.1) |
| Mexico | 18.3(15.7,20.9) | 10.7  (9.1,12.4) | 9.4  (7.9,11.1) | -41.4  (-42.0,-40.7) | -12.1  (-13.2,-10.9) | -48.5  (-49.7,-47.2) |
| Central America | 36.5 (34.1, 39.2) | 8.3  (6.8,9.8) | 7.0  (5.7,8.5) | -77.3  (-80.0,-74.9) | -14.6  (-15.9,-13.3) | -80.6  (-83.2,-78.2) |
| Brazil | 26.6 (24.8, 28.6) | 7.4  (6.0,9.0) | 6.8  (5.5,8.3) | -72.3  (-75.7,-68.6) | -8.1  (-8.8,-7.6) | -74.5  (-77.8,-70.9) |
| Rest of South America | 20.2 (18.2,22.4) | 10.6  (9.0, 12.3) | 7.7  (6.3,9.2) | -47.8  (-50.4,-45.3) | -27.0  (-29.6,-24.7) | -61.9  (-65.1,-58.8) |
| Northern Africa | 28.6(25.9,31.4) | 21.1  (19.1,23.2) | 22.6  (20.7, 24.7) | -26.3  (-26.2,-26.2) | 7.0 (8.0,6.0) | -21.1  (-20.3,-21.7) |
| Western Africa | 45.8(42.4, 49.3) | 25.1  (22.9, 27.5) | 23.3 (21.1, 25.7) | -45.3  (-46.1,-44.2) | -7.2  (-7.9,-6.7) | -49.2  (-50.4,-48.0) |
| Eastern Africa | 44.3(41.05,47.6) | 13.1 (11.3, 15.0) | 14.9  (13.1, 16.9) | -70.4  (-72.4,-68.5) | 13.9  (15.6,12.9) | -66.3  (-68.1,-64.4) |
| South Africa | 35.6  (33.1,  38.0) | 6.8 (5.5, 8.3) | 4.6  (3.4,5.9) | -80.9  (-83.4,-78.3) | -32.8  (-37.8,-28.9) | -87.2  (-89.7,-84.6) |
| Western Europe | 15.8  (13.73,  18.0) | 8.3  (6.8,9.9) | 9.3  (7.7, 10.9) | -47.8  (-50.7,-45.3) | 12.3  (14.1,10.7) | -41.4  (-43.8,-39.5) |
| Central Europe | 17.3  (15.3, 19.2) | 9.6  (8.1, 11.1) | 6.9  (5.7,8.3) | -44.4  (-46.7,-42.1) | -28.0  (-30.5,-25.6) | -60.0  (-63.0,-56.9) |
| Turkey | 28.4  (26.4,30) | 9.7  (8.2,11.3) | 9.5  (8.1, 11.2) | -66  (-69.0,-62.8) | -1.5 (-1.3,-1.5) | -66.6  (-69.4,-63.4) |
| Ukraine Region | 28.4(26.5, 30.2) | 4.7  (3.4,6.1) | 3.2  (2.0,4.4) | -83.5  (-87.2,-80.0) | -32.8  (-35.0,-30.7) | -88.9  (-92.6,-85.5) |
| Central Asia | 26.6  (23.9,29.6) | 21.5  (19.4, 23.6) | 20.6  (18.5, 22.6) | -19.4  (-18.8,-20.2) | -4.4  (-4.7,-4.3) | -23.0  (-22.6,-23.6) |
| Russia Region | 8.8(7.3,10.6) | 3.5  (2.3,4.7) | 2.5  (1.3,3.6) | -60.8  (-68.3,-55.7) | -28.0  (-41.5,-23.1) | -71.8  (-81.4,-65.9) |
| Middle East | 31.3(28.5, 34.7) | 22.7  (20.7, 25.0) | 22.3  (20.3, 24.6) | -27.5  (-27.5,-28.0) | -1.7  (-17,-1.8) | -28.8  (-28.7,-29.3) |
| India | 41.7(39.3, 44.0) | 27.3  (25.4, 29.2) | 24.2 (22.3, 26.2) | -34.6  (-35.5,-33.6) | -11.2  (-12.0,-10.4) | -41.9  (-43.2,-40.5) |
| Korea Region | 26.7  (24.3, 29.3) | 17.2 (15.3, 19.4) | 11.6  (9.9,13.4) | -35.6  (-35.5,-33.6) | -32.9  (-35.0,-30.9) | -56.8  (-59.2,-54.2) |
| China Region | 40.6  (38.6, 42.5) | 26.1  (24.1, 28.0) | 17.5  (15.6, 19.4) | -35.9  (-35.5,-33.6) | -32.9  (-35.1,-30.9) | -57.0  (-59.6,-54.3) |
| Southeastern Asia | 43.2  (40.3, 45.8) | 15.6  (13.7, 17.6) | 12.6  (11.0, 14.4) | -64.0  (-66.0,-61.7) | -18.8  (-20.0,-17.8) | -70.7  (-72.8,-68.5) |
| Indonesian Region | 36.9(34.2, 39.3) | 11.0  (9.3, 13.1) | 10.9  (9.2, 12.9) | -70.1  (-72.8,-66.7) | -1.4  (-1.1,-1.5) | -70.5  (-73.1,-67.2) |
| Japan | 15.9(13.8, 18.0) | 8.0  (6.6,9.4) | 5.7 (4.5, 7.0) | -49.8  (-52.4,-47.5) | -29.0  (-32.2,-26.1) | -64.3  (-67.8,-61.2) |
| Oceania | 5.9(4.7, 7.5) | 3.4  (2.3,4.7) | 4.1 (3.0, 5.4) | -42.8  (-51.0,-36.9) | 19.9  (29.6,14.7) | -31.4  (-36.6,-27.7) |
| Rest of South Asia | 42.1(39.4,44.6) | 27.0  (25.0, 29.1) | 24.3 (22.3, 26.3) | -35.7  (-36.6,-34.8) | -10.2  (-10.8,-9.4) | -42.3  (-43.4,-41.0) |
| Rest of Southern Africa | 43.7(40.4, 46.7) | 3.0  (1.9,4.3) | 3.6 (2.5, 5.0) | -93.1  (-95.3,-90.8) | 20.4  (29.1,14.8) | -91.7  (-93.9,-89.4) |

# **Table 5. End-Of-Pipe With Short Cooking Times Over Time**

| **Scenario** |  | **Region** | **Both sexes** | | | | | |
| --- | --- | --- | --- | --- | --- | --- | --- | --- |
| **PAF (%) (UR)** | | | **Percent change (UR)** | | |
| **2015** | **2030** | **2050** | **2015-2030** | **2030-2050** | **2015–2050** |
| Canada | 7.8(6.7,9.1) | 2.4  (1.3,3.4) | 2.1  (1.1,3.2) | -70.0  (-80.7-,  -63.0) | -10.3  (-18.9,-3.8) | -73.1  (-84.3,-64.4) |
| USA | 10.5(8.8, 12.6) | 5.0  (3.8,6.3) | 5.0  (3.9,6.4) | -53.0  (-56.8,  -50.1) | 1.6  (2.4, 10.5) | -52.3  (-55.7,-49.5) |
| Mexico | 18.3(15.7,20.9) | 15.2  (13.8,16.7) | 13.5  (11.8,15.4) | -17.0  (-12.5,-20.1) | -10.8  (-14.2,-8.2) | -26.0  (-24.9,-24.9) |
| Central America | 36.5 (34.1,39.2) | 23.6  (22.1 ,25.2) | 15.6  (14.3  ,16.9) | -35.3  (-35.1,-35.7) | -34.0  (-35.5,  -33.0) | -57.3  (-58.1,-56.9) |
| Brazil | 26.6 (24.8, 28.6) | 17.4 (16.2,18.8) | 9.8  (8.4,11.3) | -34.7  (-34.8,-34.3) | -43.9  (-47.9,-40.0) | -63.4  (-66.1,-60.6) |
| Rest of South America | 20.2 (18.2, 22.4) | 15.8 (14.2, 17.4) | 15.5  (13.8, 17.2) | -22.1  (-22.2,-22.2) | -2.1  (-2.9,-1.2) | -23.7  (-24.4,-23.2) |
| Northern Africa | 28.6  (25.9, 31.4) | 21.7 (19.8,  23.9) | 22.6  (20.7, 24.7) | -24.0  (-23.8,-24.2) | 3.9 (4.6, 3.3) | -21.3  (-20.3,-21.7) |
| Western Africa | 45.8  (42.4,49.3) | 37.7 (35.6, 40.1) | 32.0 (30.5, 33.6) | -17.7  (-16.3,-18.7) | -15.2  (-14.2,-16.3) | -30.2 (-28.2,-32.0) |
| Eastern Africa | 44.3(41.05, 47.6) | 34.3 (32.3, 36.4) | 30.4 (28.9, 32.0) | -22.6  (-21.3,  -23.5) | -11.4 (-10.8,-12.2) | -31.4 (-29.8,-32.8) |
| South Africa | 35.6(33.1, 38.0) | 23.4 (21.8, 24.8) | 9.2  (8.1, 10.5) | -34.4  (-34.1,-34.7) | -60.4  (-62.9,-57.6) | -74.1 (-75.5,-72.3) |
| Western Europe | 15.8(13.73, 18.0) | 8.3 (6.8, 9.9) | 8.2  (6.7, 9.7) | -47.5  (-50.3,-45.1) | -1.6 (-1.3,-2.0) | -48.3 (-50.9,-46.2) |
| Central Europe | 17.3(15.3, 19.2) | 11.02 (9.7, 12.4) | 8.3  (6.9,9.7) | -36.1  (-36.7,-35.3) | -25.1  (-28.3,-21.9) | -52.1  (-54.6,-49.5) |
| Turkey | 28.4  (26.4,30.0) | 11.2 (9.6, 12.9) | 11.7  (10.2, 13.5) | -60.8  (-63.5,-57.8) | 5.0 (5.3-4.8) | -58.8 (-61.6,-55.8) |
| Ukraine Region | 28.4(26.5,30.2) | 9.9 (8.7, 11.2) | 5.8  (4.4,7.2) | -65.1 (-67.0,-63.2) | -42.0  (-49.5,-35.5) | -79.8 (-83.3,-76.2) |
| Central Asia | 26.6(23.9,29.6) | 22.3 (20.7,24.9) | 23.1 (21.0,25.1) | -14.6 (-13.6,-15.9) | 1.2 (1.6,0.9) | -13.6 (-12.2,-15.1) |
| Russia Region | 8.8(7.3,10.6) | 4.5 (3.3,5.8) | 4.0 (2.9,5.3) | -4.9 (-5.4,-4.5) | -11.4 (-13.4,-10.0) | -55.0 (-60.4,-50.6) |
| Middle East | 31.3(28.5, 34.7) | 23.8 (21.8, 26.1) | 23.9  (21.9,26.2) | -24.0  (-23.8,-24.8) | 0.41 (0.68,0.10) | -23.7 (-23.3,-24.7) |
| India | 41.7  (39.3,44.0) | 35.4 (33.9, 37.0) | 32.1 (30.5, 33.6) | -15.1  (-13.9,-16.1) | -9.5  (-10.1,-9.0) | -23.1  (-22.5,-23.7) |
| Korea Region | 26.7(24.3, 29.3) | 19.7 (17.7, 21.8) | 15.3  (13.5, 17.4) | -26.5 (-27.3,-25.6) | -22.2  (-23.6,-20.4) | -42.8 (-44.5,-40.8) |
| China Region | 40.6  (38.6,42.5) | 31.2 (29.7,32.7) | 25.0 (23.3,26.8) | -23.1 (-23.2,  -22.9) | -19.8  (-21.6,-18.1) | -38.4 (-39.8,-36.9) |
| Southeastern Asia | 43.2(40.3,45.8) | 31.0 (29.4,32.6) | 23.7 (22.3,25.1) | -28.2 (-27.0,  -28.8) | -23.8  (-24.2,-23.1) | -45.3 (-44.7,-45.3) |
| Indonesian Region | 36.9(34.2, 39.3) | 28.0 (26.2,29.6) | 22.1 (20.5,23.6) | -15.1  (-13.9,  -16.1) | -21.1  (-21.5,-20.4) | -40.2 (-40.0,-40.0) |
| Japan | 15.9(13.8,18.0) | 9.3 (7.8, 10.8) | 7.2 (5.9, 8.6) | -41.8 (-43.8,-40.1) | -22.6  (-24.8,-20.7) | -54.9 (-57.8,-52.5) |
| Oceania | 5.9(4.7,7.5) | 3.8 (2.8, 5.1) | 3.7 (2.6, 5.0) | -36.5  (-41.9,  -32.6) | -2.6 (-4.7,-0.92) | -38.1 (-44.6,-33.3) |
| Rest of South Asia | 42.1(39.4, 44.6) | 32.8 (31.3, 34.4) | 30.3 (28.6, 32.0) | -22.0  (-20.5,-22.9) | -7.6 (-8.7,-6.8) | -27.9  (-27.4,-28.2) |
| Rest of Southern Africa | 43.7(40.4, 46.7) | 37.0 (34.6,39.4) | 29.3  (27.3,31.3) | -15.3  (-14.3,-15.7) | -20.8  (-21.0,  -20.5) | -32.9 (-32.3,-33.0) |

# **Table 6. ‘Waste Reduction’ With Short Cooking Times Over Time**

| **Scenario** |  | **Region** | **Both sexes** | | | | | |
| --- | --- | --- | --- | --- | --- | --- | --- | --- |
| **PAF (%) (UR)** | | | **Percent change (UR)** | | |
| **2015** | **2030** | **2050** | **2015-2030** | **2030-2050** | **2015–2050** |
| Canada | 7.8  (6.7,9.1) | 2.6  (1.5,3.7) | 2.2  (1.1,3.4) | -66.7  (-77.6,-59.3) | -15.4  (-26.7,-8.1) | -71.8  (-83.6,  -62.6) |
| USA | 10.5  (8.8,  12.6) | 5.4  (4.1,6.8) | 5.1  (3.8,6.5) | -48.6  (-53.4,-46.0) | -5.6  (-7.3,-4.4) | -51.4  (-56.8,  -48.4) |
| Mexico | 18.3  (15.7,20.9) | 15.3  (13.8,16.8) | 13.9  (12.1,15.8) | -16.4  (-12.1,-19.6) | -9.2  (-12.1,-19.6) | -24.0  (-22.9,-24.4) |
| Central America | 36.5 (34.1,39.2) | 24.0  (22.4,  25.7) | 15.4  (14.0,16.8) | -34.2  (-35.1,  -34.6) | -35.8  (-37.5,-34.6) | -57.8  (-58.9,  -57.1) |
| Brazil | 26.6  (24.8,  28.6) | 17.4  (16.1,18.7 | 8.3  (7.2,  9.7) | -34.6  (-35.1,-34.6) | -52.3  (-55.3,-48.1) | -68.8  (-71.0,-66.1) |
| Rest of South America | 20.2  (18.2,  22.4) | 16.1  (14.4,17.8) | 15.2  (13.4,17.0) | -20.3  (-20.9,  -20.5) | -5.6  (-6.9,-4.5) | -24.8  (-26.4,-24.2) |
| Northern Africa | 28.6  (25.9,  31.4) | 21.5  (19.6,23.6) | 22.7  (20.8,24.8) | -24.8  (-24.3,  -26.8) | 5.6  (6.1,7.8) | -20.6  (-19.7,-21.0) |
| Western Africa | 45.8  (42.4,49.3) | 36.8  (34.7,39.1) | 31.5  (30.1,33.1) | -19.7  (-18.2,-20.7) | -14.4  (-13.3,-9.5) | -31.2  (-29.0,  -32.9) |
| Eastern Africa | 44.3  (41.05,47.6) | 34.1  (32.1,36.2) | 30.4  (28.9,32.0) | -23.0  (-21.7,-23.9) | -10.9  (-10.0,-11.6) | -31.4  (-29.5,-32.8) |
| South Africa | 35.6  (33.1,38.0) | 24.5  (22.9,26.0) | 10.4  (9.2,11.7) | -31.0  (-30.8,  -31.6) | -57.6  (-59.8,-55.0) | -70.7  (-72.2,-69.2) |
| Western Europe | 15.8  (13.73,18.0) | 9.6  (8.0,11.4) | 8.5  (7.0,10.2) | -39.2  (-40.9,-36.7) | -11.5  (-13.6,-10.5) | -46.2  (-48.9,-43.3) |
| Central Europe | 17.3  (15.3,19.2) | 12.1  (10.7,13.6) | 8.2  (6.8,9.7) | -30.1  (-30.1,-29.2) | -32.2  (-36.4,-28.7) | -52.6  (-55.6,-49.5) |
| Turkey | 28.4(26.4,30) | 12.2  (10.6,14.0) | 10.8  (9.3,12.5) | -57.0  (-59.8,-53.9) | -11.5  (-12.3,-10.7) | -62.0  (-64.8,-58.9) |
| Ukraine Region | 28.4(26.5,30.2) | 10.2  (9.0,11.4) | 5.0  (3.7,6.4) | -64.1  (-65.7,  -62.3) | -51.0  (-59.3,-43.9) | -82.4  (-86.0,-78.8) |
| Central Asia | 26.6  (23.9,29.6) | 22.7  (20.7,24.7) | 22.1  (20.1,24.1) | -14.7  (-13.4,-16.6) | -2.6  (-2.9,-2.4) | -16.9  (-15.9,-18.6) |
| Russia Region | 8.8  (7.3,10.6) | 4.9  (3.7,6.2) | 3.6  (2.4,4.8) | -44.3  (-49.3,-41.5) | -26.5  (-35.1,-22.6) | -59.1  (-67.1,-54.7) |
| Middle East | 31.3  (28.5,34.7) | 24.3  (22.3,26.7) | 24.8  (22.8,27.2) | -22.4  (-21.8,-23.1) | 2.1  (2.2,1.9) | -20.8  (-20.0,-21.6) |
| India | 41.7  (39.3,44.0) | 36.0  (34.4,37.6) | 32.3  (30.6,34.0) | -13.7  (-12.5,-14.5) | 10.3  (-11.0,-9.6) | -22.5  (-22.1,-22.7) |
| Korea Region | 26.7  (24.3,29.3) | 19.8  (17.8,22.0) | 16.6  (14.6,18.7) | -25.8  (-26.7,-24.9) | -16.2  (-18.0,-15.0) | -37.8  (-39.9,-36.2) |
| China Region | 40.6  (38.6,42.5) | 32.5  (30.9,34.0) | 26.1  (24.3,28.0) | -20.0  (-19.9,  -20.0) | -19.7  (-21.4,  -17.6) | -35.7  (-37.0,  -34.1) |
| Southeastern Asia | 43.2  (40.3,45.8) | 31.2  (29.6,32.9) | 21.9  (20.6,23.3) | -27.8  (-26.6,-28.2) | -29.8  (-30.4,-29.2) | -49.3  (-48.9,-49.1) |
| Indonesian Region | 36.9  (34.2,39.3) | 27.0  (25.3,  28.6) | 21.3  (19.9,22.8) | -26.8  (-26.0,-27.2) | -21.1  (-21.3,-20.3) | -42.3  (-41.8,-42.0) |
| Japan | 15.9  (13.8,18.0) | 9.6  (8.0,11.3) | 7.8  (6.3,9.3) | -39.6  (-42.0,-37.2) | -18.8  (-21.3,-17.7) | -50.9  (-54.3,-48.3) |
| Oceania | 5.9  (4.7,7.5) | 3.8  (2.8,5.1) | 3.5  (2.4,4.8) | -35.6  (-40.4,-32.0) | -7.9  (-14.3,-5.9) | -40.7  (-48.9,-36.0) |
| Rest of South Asia | 42.1(39.4,44.6) | 32.4  (30.9,33.9) | 30.0  (28.3,31.7) | -23.0  (-21.6,-24.0) | -7.4  (-8.4,-6.5) | -28.7  (-28.2,-28.9) |
| Rest of Southern Africa | 43.7(40.4,46.7) | 36.7  (34.3,39.0) | 29.1  (27.1,31.0) | -16.0  (-15.1,  -16.5) | -20.7  (-21.0,-20.5) | -33.4  (-32.9,-33.6) |

,

# **Table 7. All With Short Cooking Times Over Time**

| **Scenario** |  | **Region** | **Both sexes** | | | | | |
| --- | --- | --- | --- | --- | --- | --- | --- | --- |
| **PAF (%) (UR)** | | | **Percent change (UR)** | | |
| **2015** | **2030** | **2050** | **2015-2030** | **2030-2050** | **2015–2050** |
| Canada | 7.8  (6.7,9.1) | 0.92  (-0.30, 2.04) | 2.2  (1.04,3.4) | -88.2  (-104.5,  -77.6) | 139.1  (-446.7,66.7) | -71.8  (-84.5,  -62.6) |
| USA | 10.5(8.8, 12.6) | 4.5  (3.3,5.9) | 4.8  (3.6,6.2) | -57.1  (-62.5,  -53.2) | 6.7  (9.1,5.1) | -54.3  (-59.1,  -50.8) |
| Mexico | 18.3  (15.7,20.9) | 9.7  (8.1,11.4) | 9.7  (8.1,11.4) | -47.0  (-48.4,  -45.5) | 0.0  (0.0,0.0) | -47.0  (-48.4,  -45.5) |
| Central America | 36.5 (34.1, 39.2) | 8.3  (6.82,9.9) | 6.3  (4.9,7.7) | -77.3  (-80.0,  -74.7) | 24.1  (-28.2,  -22.2) | -82.7  (-85.6,  -80.4) |
| Brazil | 26.6 (24.8, 28.6) | 6.4  (5.1,7.9) | 3.9  (2.8,  5.2) | -75.9  (-79.4,  -72.4) | -39.1  (-45.1,  -34.2) | -85.3  (-88.7,  -81.8) |
| Rest of South America | 20.2 (18.2, 22.4) | 10.8  (9.2,12.5) | 6.0  (4.7,7.5) | -46.5  (-49.5,  -44.2) | -44.4  (-48.9  -40.0) | -70.3  (-74.2,  -66.5) |
| Northern Africa | 28.6(25.9, 31.4) | 20.9  (19.0,23.0) | 22.7  (20.8,  24.8) | -26.9  (-26.6,  -26.8) | 8.6  (9.5,7.8) | -20.6  (-19.7,-21.0) |
| Western Africa | 45.8(42.4, 49.3) | 23.8  (21.7,26.1) | 22.1  (20.0,24.4) | -48.0  (-48.8,-47.1) | -7.1  (-7.8,-6.5) | -51.7  (-52.8,-50.5) |
| Eastern Africa | 44.3(41.05,47.6) | 12.9  (11.2,14.7) | 13.9  (12.1,15.8) | -70.9  (-72.7,  -69.1) | 7.8  (8.0,7.5) | -68.6  (-70.5,  -66.8) |
| South Africa | 35.6  (33.1, 38.0) | 6.3  (5.0,7.8) | 4.5  (3.3,5.8) | -82.3  (-84.9,  -79.5) | -28.6  (-34.0,  -25.6) | -87.4  (-90.0,  -84.7) |
| Western Europe | 15.8  (13.73,18.0) | 8.1  (6.6,9.7) | 8.2  (6.7, 9.8) | -48.7  (-51.8,  -46.1) | 1.2  (1.5,1.0) | -48.1  (-51.1,  -45.6) |
| Central Europe | 17.3  (15.3,19.2) | 7.9  (6.6,9.4) | 4.9  (3.7,6.2) | -54.3  (-56.9,  -51.0) | -38.0  (-43.9,-34.0) | -71.7  (-75.8,  -67.7) |
| Turkey | 28.4  (26.4,30) | 8.4  (7.1,10.0) | 7.5  (6.1,9.0) | -70.4  (-73.1,  -67.1) | -10.7  (-14.1,  -10.0) | -73.6  (-76.9,  -70.4) |
| Ukraine Region | 28.4  (26.5,30.2) | 3.9  (2.7,5.3) | 1.6  (0.50,2.8) | -86.3  (-89.8,  -82.5) | -59.0  (-81.5,  -47.2) | -94.4  (-98.1,  -90.7) |
| Central Asia | 26.6  (23.9,29.6) | 20.9  (18.9,22.9) | 19.6  (17.5,21.5) | -21.4  (-20.9,  -22.6) | -6.2  (-7.4,-6.1) | -26.3  (-26.8,  -27.4) |
| Russia Region | 8.8  (7.3, 10.6) | 3.0  (1.8,4.2) | 1.7  (0.63,2.8) | -65.9  (-75.3,-60.4) | -43.4  (-66.7,-33.3) | -80.7  (-91.8,-73.6) |
| Middle East | 31.3  (28.5,34.7) | 22.7  (20.7,  25.0) | 22.7  (20.7,25.0) | -27.5  (-27.4,  -28.0) | 0.0  (0.0,0.0) | -27.5  (-27.4,  -28.0) |
| India | 41.7  (39.3, 44.0) | 25.7  (23.7,  27.7) | 9.7  (8.1,11.5) | -38.4  (-39.7,-37.0) | -62.3  (-65.8,-58.5) | -76.7  (-79.4,-73.9) |
| Korea Region | 26.7  (24.3,29.3) | 16.6  (14.6, 18.7) | 10.8  (9.2,12.7) | -37.8  (-39.9,-36.2) | -34.9  (-37.0,-32.1) | -59.6  (-62.1,  -56.7) |
| China Region | 40.6  (38.6,42.5) | 25.8  (23.8,27.9) | 18.2  (16.2,20.2) | -36.5  (-38.3,  -34.4) | -29.5  (-31.9,  -27.6) | -55.2  (-58.0,  -52.5) |
| Southeastern Asia | 43.2  (40.3,45.8) | 14.7  (12.9,16.7) | 7.7  (6.3,9.2) | -66.0  (-68.0,  -63.5) | -47.6  (-51.2,-44.9) | -82.2  (-84.4,  -80.0) |
| Indonesian Region | 36.9  (34.2,39.3) | 10.8  (9.2,12.8) | 9.7  (8.1,11.5) | -70.7  (-73.1,  -67.4) | -10.2  (-12.0,-10.2) | -73.7  (-76.3,-70.7) |
| Japan | 15.9  (13.8,18.0) | 7.9  (6.5,9.5) | 5.7  (4.4,7.1) | -50.3  (-52.9,  -47.2) | -27.8  (-32.3,  -25.3) | -64.1  (-68.1,  -60.6) |
| Oceania | 5.9  (4.7,7.5) | 3.3  (2.2,4.6) | 2.8  (1.7,4.1) | -44.1  (-53.2,  -38.7) | -15.2  (-22.7,  -10.9) | -52.5  (-63.8,  -45.3) |
| Rest of South Asia | 42.1  (39.4,44.6) | 24.8  (22.8,26.9) | 17.33  (15.3,19.3) | -41.1  (-42.1,  -39.7) | -30.2  (-32.9,  -28.3) | -58.9  (-61.2,  -56.7) |
| Rest of Southern Africa | 43.7  (40.4,46.7) | 2.5  (1.4,3.7) | 4.6  (3.4,6.0) | -94.3  (-96.5,  -92.1) | 84.0  (142.9,  62.2) | -89.5  (-91.6,-87.2) |

**Sensitivity Analysis: Full 26 Region Results Including Uncertainty Ranges (For Long Cooking Time Distribution)**

# **Table 1. SSP2 Baseline Long Cook Time Over Time**

| **Scenario** |  | **Region** | **Both sexes** | | | | | |
| --- | --- | --- | --- | --- | --- | --- | --- | --- |
| **PAF (%) (UR)** | | | **Percent change (UR)** | | |
| **2015** | **2030** | **2050** | **2015-2030** | **2030-2050** | **2015–2050** |
| Canada | 11.0  (9.6,12.6) | 4.1  (3.1,5.2) | 2.4  (1.2,3.5) | -62.7  (-67.7,  -58.7) | -41.5  (-61.3,  -32.7) | -78.2  (-87.5  , -72.2) |
| USA | 11.2  (9.1,13.5) | 5.5  (4.2,7.0) | 5.4  (4.2,6.9) | -50.9  (-53.8,  -48.1) | -1.8  (0.0,  -1.4) | -51.8  (-53.8,  -48.9) |
| Mexico | 18.0  (15.6,20.5) | 16.6  (15.1, 18.1) | 14.6  (12.8,  16.5) | -7.8  (-3.2,  -11.7) | -12.0  (-15.2,  -8.8) | -18.9  (-17.9,  -19.5) |
| Central America | 41.4  (36.9,  46.9) | 27.4  (24.5, 30.8) | 17.0  (15.5, 18.6) | -33.8  (-33.6,  -34.3) | -38.0  (-36.7,  -39.6) | -58.9  (-58.0,  -60.3) |
| Brazil | 29.3  (27.2,31.6) | 20.9  (19.5,22.4) | 11.2  (9.9, 12.6) | -28.7  (-28.3,  -29.1) | -46.4  (-49.2,  -43.8) | -61.8  (-63.6,  -60.1) |
| Rest of South America | 21.6  (19.6, 23.6) | 16.8  (15.1, 18.5) | 15.9  (14.2, 17.8) | -22.2  (-22.9,  -21.6) | -5.4  (-6.0,  -3.8) | -26.4  (-27.6,  -24.6) |
| Northern Africa | 27.8  (25.4, 30.4) | 21.5  (19.6, 23.6) | 22.4  (20.6, 24.5) | -22.7  (-22.8,  -22.4) | 4.2  (5.1,3.8) | -19.4  (-18.9,  -19.4) |
| Western Africa | 49.8  (43.7, 56.9) | 42.4  (37.5, 48.4) | 33.7  (31.2, 36.7) | -14.9  (-14.2,  -14.9) | -20.5 (-16.8,24.2) | -32.3  (-28.6,  -35.5) |
| Eastern Africa | 48.4  (42.5, 55.3) | 39.4  (34.7, 44.5) | 32.4  (29.9, 35.0) | -18.6  (-18.4,  -19.5) | -17.8  (-13.8,  -21.3) | -33.1  (-29.6,  -36.7) |
| South Africa | 38.5  (34.6,  42.8) | 27.6  (24.9,  30.5) | 11.5  (10.2, 12.8) | -28.3  (-28.0,  -28.7) | -58.3  (-59.0,  -58.0) | -70.1  (-70.5,  -70.1) |
| Western Europe | 17.2  (14.8, 19.8) | 9.7  (8.1, 11.5) | 9.6  (8.0, 11.3) | -43.6  (-45.3,  -42.0) | -1.0  (-1.2,  -1.7) | -44.2  (-45.9,  -42.9) |
| Central Europe | 19.2  (17.0, 21.5) | 13.2  (11.8, 14.7) | 8.6  (7.3, 10.1) | -31.3  (-30.6,  -31.6) | -34.8  (-38.1,  -31.3) | -55.2  (-57.1,  -53.0) |
| Turkey | 29.2  (26.9, 31.4) | 12.6  (11.0, 14.3) | 12.7  (11.1, 14.6) | -56.8  (-59.1,  -54.5) | 0.80  (0.91,2.1) | -56.5  (-58.7,  -53.5) |
| Ukraine Region | 32.1  (29.3,  34.7) | 13.1  (11.9,  14.4) | 6.2  (4.8,  7.6) | -59.2  (-59.4,  -58.5) | -52.7  (-59.7,  -47.2) | -80.7  (-83.6,  -78.1) |
| Central Asia | 25.8  (23.3, 28.6) | 22.7  (20.7, 24.7) | 22.5  (20.4, 24.4) | -12.0  (-11.2,  -13.6) | -0.90  (-1.4,  -1.2) | -12.8  (-12.4,  -14.7) |
| Russia Region | 10.3  (8.6,12.2) | 5.0  (3.8, 6.4) | 4.3  (3.1,5.5) | -51.5  (-55.8,  -47.5) | -14.0  (-18.4,  -14.1) | -58.3  (-64.0,  -54.9) |
| Middle East | 29.7  (27.2, 32.6) | 24.3  (22.3, 26.7) | 24.5  (22.5, 26.8) | -18.2  (-18.0,  -18.1) | 0.8  (0.9,0.4) | -17.5  (-17.3,  -17.8) |
| India | 44.3  (40.1,  49.2) | 39.5  (36.2,  43.0) | 32.9  (31.2,  34.6) | -10.8  (-9.7,  -12.6) | -16.7  (-13.8,  -19.5) | -25.7  (-22.2,  -29.7) |
| Korea Region | 27.5  (25.0,  30.1) | 20.0  (18.0,  22.2) | 16.4  (14.5,  18.5) | -27.3  (-28.0,  -26.2) | -18.0  (-19.4,  -16.7) | -40.4  (-42.0,  -38.5) |
| China Region | 42.7  (40.0,  45.5) | 33.3  (31.7,  35.1) | 25.9  (24.1,  27.8) | -22.0  (-20.8,  -22.9) | -22.2  (-24.0,  -20.8) | -39.3  (-39.8,  -38.9) |
| Southeastern Asia | 47.4  (42.5,  52.8) | 34.8  (31.6,  38.4) | 25.3  (23.5,  27.1) | -26.6  (-25.6,  -27.3) | -27.3  (-25.6,  -29.4) | -46.6  (-44.7,  -48.7) |
| Indonesian Region | 40.4  (36.0,  45.1) | 30.8  (27.8,  34.0) | 22.8  (21.2,  24.6) | -23.8  (-22.8,  -24.6) | -26.0  (-23.7,  -29.4) | -43.6  (-41.1,  -45.5) |
| Japan | 17.9  (15.4,  20.6) | 9.6  (8.1,11.3) | 7.7  (6.3,9.2) | -46.4  (-47.4,  -45.1) | -19.8  (-14.8,  -19.5) | -57.0  (-55.2,  -55.8) |
| Oceania | 9.0  (7.7,10.6) | 4.7  (3.6,5.9) | 3.8  (2.7,5.1) | -47.8  (-53.2,  -44.3) | -19.1  (-25.0,  -13.6) | -57.8  (-64.9,  -51.9) |
| Rest of South Asia | 44.7  (40.3, 49.7) | 33.9  (32.1, 35.9) | 30.5  (28.8, 32.2) | -24.2  (-20.3,  -27.8) | -10.0  (-10.3,  -10.3) | -31.8  (-28.5,  -35.2) |
| Rest of Southern Africa | 48.3  (42.6, 54.8) | 43.3  (37.9, 49.8) | 34.3  (29.8, 39.8) | -10.4  (-11.0,  -9.1) | -20.8  (-21.4,  -20.1) | -29.0  (-30.0,  -27.4) |

# **Table 2. Clean Cooking with Long Cook Time Over Time**

| **-** |  | **Region** | **Both sexes** | | | | | |
| --- | --- | --- | --- | --- | --- | --- | --- | --- |
| **PAF (%) (UR)** | | | **Percent change (UR)** | | |
| **2015** | **2030** | **2050** | **2015-2030** | **2030-2050** | **2015–2050** |
| Canada | 11.0  (9.6,12.6) | 1.6  (0.4,2.7) | 2.4  (1.2,3.6) | -85.5  (-95.8,  -78.6) | 50.0  (200.0,  33.3) | -78.2  (-87.5,  -71.4) |
| USA | 11.2  (9.1,13.5) | 5.5  (4.2,7.0) | 5.5  (4.2,7.0) | -50.9  (-53.8,  -48.1) | 0.0  (14.3,8.6) | -50.9  (-47.3,  -43.7) |
| Mexico | 18.0  (15.6, 20.5) | 11.9  (10.2,13.6) | 14.8  (13.0,16.7) | -33.9  (-34.6,  -33.7) | 24.4  (27.5,22.8) | -17.8  (-16.7,  -18.5) |
| Central America | 41.4  (36.9,46.9) | 9.6  (8.1,11.4) | 9.6  (8.0,11.3) | -76.8  (-78.0,  -75.7) | 0.0  (-1.2,  -0.9) | -76.8  (-78.3,  -75.9) |
| Brazil | 29.3  (27.2, 31.6) | 9.6  (8.1,11.4) | 8.5  (7.0,10.1) | -67.2  (-74.3,  -68.0) | -11.5  (0.0,0.0) | -71.0  (-74.3,  -68.0) |
| Rest of South America | 21.6  (19.6, 23.6) | 14.8  (13.0,16.7) | 15.7  (13.9,17.6) | 31.5  (-32.1,  -29.2) | 6.1  (0.0,5.4) | -27.3  (-32.1,  -25.4) |
| Northern Africa | 27.8  (25.4,30.4) | 21.5  (19.6,23.6) | 22.7  (20.8,24.8) | -29.5  (-33.5,  -24.3) | 15.8  (23.1,7.8) | -18.3  (-18.1,  -18.4) |
| Western Africa | 49.8  (43.7, 56.9) | 25.7  (23.7,28.0) | 25.7  (23.7,28.0) | -48.4  (-45.8,  -50.8) | 0.0  (0.0,0.0) | -48.4  (-45.8,  -50.8) |
| Eastern Africa | 48.4  (42.5, 55.3) | 14.8  (13.0, 16.7) | 26.3  (24.2, 28.4) | -69.4  (-69.4,  -69.8) | 63.5  (84.6,70.1) | -50.0  (-43.5,  -48.6) |
| South Africa | 38.5  (34.6, 42.8) | 8.5  (7.0, 10.1) | 7.2  (5.8,8.8) | -77.9  (-79.8,  -75.9) | -15.3  (-15.7,  -14.6) | -81.3  (-83.0,  -79.4) |
| Western Europe | 17.2  (14.8, 19.8) | 9.6  (8.0,11.4) | 9.6  (8.0,11.4) | -53.5  (-59.5,  -49.0) | 20.0  (33.3,12.9) | -44.2  (-45.9,  -42.4) |
| Central Europe | 19.2  (17.0, 21.5) | 10.8  (9.2, 12.4) | 8.4  (7.0,10.0) | -43.8  (-45.9,  -42.3) | -22.2  (-23.9,  -19.4) | -56.3  (-58.8,  -53.5) |
| Turkey | 29.2  (26.9, 31.4) | 11.8  (10.2, 13.6) | 12.9  (11.2,14.7) | -59.6  (-65.8,  -54.5) | 9.3  (21.7,2.8) | -55.8  (-58.4,  -53.2) |
| Ukraine Region | 32.1  (29.3,34.7) | 6.3  (4.9,7.8) | 6.2  (4.8,7.7) | -80.4  (-82.3,  -78.4) | -1.6  (-5.8, -2.7) | -80.7  (-83.3,  -79.0) |
| Central Asia | 25.8  (23.3, 28.6) | 22.7  (20.7,24.7) | 22.7  (20.6,24.7) | -12.0  (-11.2,  -13.6) | 0.0  (-0.5,0.0) | -12.0  (-11.6,  -13.6) |
| Russia Region | 10.3  (8.6,12.2) | 5.0  (3.8,6.4) | 4.3  (3.2,5.6) | -51.5  (-55.8,  -47.5) | -14.0  (-10.5,  -12.5) | -58.3  (-60.5,  -54.1) |
| Middle East | 29.7  (27.2,32.6) | 24.3  (22.3, 26.7) | 24.8  (22.8,27.2) | -18.2  (-16.5,  -18.1) | 2.0  (0.44,0.0) | -16.5  (-16.2,  -18.1) |
| India | 44.3  (40.1, 49.2) | 32.4  (30.3, 34.2) | 32.1  (30.1,34.0) | -27.1  (-24.4,  -30.5) | -0.9  (-0.7,  -0.6) | -27.5  (-24.9,  -30.9) |
| Korea Region | 27.5  (25.0, 30.1) | 19.6  (17.6,21.8) | 16.6  (14.6,18.7) | -28.7  (-29.6,  -27.6) | -15.3  (-17.0,  -14.2) | -39.6  (-41.6,  -37.9) |
| China Region | 42.7  (40.0,45.5) | 30.3  (28.3,32.3) | 24.9  (22.8,26.9) | -29.0  (-29.3,  -29.0) | -17.8  (-19.4,  -16.7) | -41.7  (-43.0,  -40.9) |
| Southeastern Asia | 47.4  (42.5, 52.8) | 18.1  (16.1, 20.1) | 17.3  (15.3,19.3) | -61.8  (-62.1,  -61.9) | -4.4  (-16.1,  -11.4) | -63.5  (-68.2,  -66.3) |
| Indonesian Region | 40.4  (36.0, 45.1) | 12.9  (11.1, 14.9) | 15.7  (13.8,17.8) | -68.1  (-69.2,  -67.0) | 21.7  (24.3,  19.5) | -63.6  (-61.7,  -60.5) |
| Japan | 17.9  (15.4, 20.6) | 9.6  (8.1, 11.3) | 7.8  (6.3,9.3) | -46.4  (-47.4,  -45.1) | -18.8  (-22.2,  -17.7) | -56.4  (-59.1,  -54.9) |
| Oceania | 9.0  (7.7,10.6) | 3.3  (2.2,4.6) | 3.7  (2.6,5.1) | -63.3  (-71.4,  -56.6) | 12.1  (12.1,  10.9) | -58.9  (-66.2,  -51.9) |
| Rest of South Asia | 44.7  (40.3,49.7) | 29.6  (27.6,31.6) | 29.6  (27.6, 31.6) | -33.8  (-31.5,  -36.4) | 0.0  (0.0,0.0) | -33.8  (-31.5,  -36.4) |
| Rest of Southern Africa | 48.3  (42.6, 54.8) | 3.9  (2.7,5.2) | 6.7  (5.3,8.3) | -91.9  (-93.7,  -90.5) | 71.8  (96.3,59.6) | -86.1  (-87.6,  -84.9) |

# **Table 3. Mitigation Long Cook Time Over Time**

| **Scenario** |  | **Region** | **Both sexes** | | | | | |
| --- | --- | --- | --- | --- | --- | --- | --- | --- |
| **PAF (%) (UR)** | | | **Percent change (UR)** | | |
| **2015** | **2030** | **2050** | **2015-2030** | **2030-2050** | **2015–2050** |
| Canada | 11.0  (9.6,12.6) | 1.8  (0.7,2.9) | 2.7  (1.6,3.9) | -83.6  (-92.7,  -77.0) | 50.0  (128.6,34.5) | -75.5  (-83.3,  -69.0) |
| USA | 11.2  (9.1,13.5) | 4.9  (3.7,6.4) | 6.1  (4.8,7.6) | -56.2  (-59.3  ,-52.6) | 24.5  (29.7,18.7) | -45.5  (-47.3,-43.7) |
| Mexico | 18.0  (15.6,20.5) | 12.2  (10.7,13.7) | 9.7  (8.1,11.4) | -32.2  (-31.4,  -35.1) | -20.5  (-24.3,  -14.3) | -46.1  (-48.1,  -44.4) |
| Central America | 41.4  (36.9,46.9) | 13.2  (11.9,14.6) | 15.6  (14.1,17.2) | -68.1  (-67.8,  -68.9) | 18.2  (18.5,17.8) | -62.3  (-61.8,  -63.3) |
| Brazil | 29.3  (27.2,31.6) | 10.7  (9.6,12.0) | 9.8  (8.6,11.2) | -63.5  (-64.7,  -62.0) | -8.4  (-10.4,  -6.7) | -66.6  (-68.4,  -64.6) |
| Rest of South America | 21.6  (19.6,23.6) | 11.6  (10.0,13.2) | 8.6  (7.2,10.1) | -46.3  (-49.0,  -43.6) | -25.9  (-28.0,  -24.1) | -60.2  (-63.3,  -57.2) |
| Northern Africa | 27.8  (25.4,30.4) | 20.9  (19.0,23.0) | 22.7  (20.8,24.8) | -24.8  (-25.2,  -24.3) | 8.6  (9.5,7.8) | -18.3  (-18.1,  -18.4) |
| Western Africa | 49.8  (43.7,56.9) | 30.3  (28.6,31.9) | 32.6  (30.0,35.6) | -39.2  (-34.6,  -44.3) | 7.6  (4.9,12.3) | -34.5  (-31.4,  -37.4) |
| Eastern Africa | 48.4  (42.5,55.3) | 20.7  (19.0,22.5) | 26.1  (23.5,29.1) | -57.2  (-55.3,  -59.3) | 26.1  (23.7,29.3) | -46.1  (-44.7,  -47.4) |
| South Africa | 38.5  (34.6,42.8) | 11.9  (10.7,13.1) | 9.6  (8.5,10.9) | -69.1  (-69.1,  -69.4) | -19.3  (-20.6,  -16.8) | -75.1  (-75.4,  -74.5) |
| Western Europe | 17.2  (14.8,19.8) | 8.5  (6.9,10.1) | 9.7  (8.2,11.3) | -50.6  (-53.4,  -49.0) | 14.1  (18.8,11.9) | -43.6  (-44.6,  -42.9) |
| Central Europe | 19.2  (17.0,21.5) | 10.3  (8.9,11.8) | 7.4  (6.1,8.8) | -46.4  (-47.6,  -45.1) | -28.2  (-31.5,  -25.4) | -61.5  (-64.1,  -59.1) |
| Turkey | 29.2  (26.9,31.4) | 9.9  (8.4,11.5) | 9.7  (8.2,11.3) | -66.1  (-68.8,  -63.4) | -2.0  (-2.4,  -1.7) | -66.8  (-69.5,  -64.0) |
| Ukraine Region | 32.1  (29.3,34.7) | 6.3  (5.2,7.5) | 3.3  (2.1,4.6) | -80.4  (-82.3,  -78.4) | -47.6  (-59.6,  -38.7) | -89.7  (-92.8,  -86.7) |
| Central Asia | 25.8  (23.3,28.6) | 20.9  (18.9,22.9) | 20.3  (18.2,22.2) | -19.0  (-13.7,  -16.1) | -2.9  (-0.5,0.8) | -21.3  (-14.2,  -15.4) |
| Russia Region | 10.3  (8.6,12.2) | 3.4  (2.3,4.7) | 2.5  (1.4,3.7) | -67.0  (-73.3,  -61.5) | -26.5  (-39.1,  -21.3) | -75.7  (-83.7,  -69.7) |
| Middle East | 29.7  (27.2,32.6) | 22.7  (20.7,25.0) | 22.7  (20.7,25.0) | -23.6  (-23.9,  -23.3) | 0  (0.0,0.0) | -23.6  (-23.9,  -23.3) |
| India | 44.3  (40.1,49.2) | 31.5  (30.0,32.8) | 27.1  (25.3,28.8) | -28.9  (-25.2,  -33.3) | -14.0  (-15.7,  -12.2) | -38.8  (-36.9,  -41.5) |
| Korea Region | 27.5  (25.0,30.1) | 17.6  (15.6,19.7) | 11.9  (10.2,13.8) | -36.0  (-37.6,  -34.6) | -32.4  (-34.6,  -29.9) | -56.7  (-59.2,  -54.2) |
| China Region | 42.7  (40.0,45.5) | 28.7  (27.1,30.2) | 20.2  (18.5,21.9) | -32.8  (-32.2,  -33.6) | -29.6  (-31.7,  -27.5) | -52.7  (-53.8,  -51.9) |
| Southeastern Asia | 47.4  (42.5,52.8) | 21.7  (20.4,23.3) | 22.9  (21.2,24.8) | -54.2  (-50.4,  -53.0) | 5.5  (3.9,6.43) | -51.7  (-50.1,  -53.0) |
| Indonesian Region | 40.4  (36.0,45.1) | 16.3  (14.9,17.7) | 20.0  (18.4,21.7) | -59.7  (-58.6,  -60.8) | 22.7  (23.5,22.6) | -50.5  (-48.9,  -51.9) |
| Japan | 17.9  (15.4,20.6) | 8.3  (6.8,9.9) | 6.0  (4.7,7.4) | -53.6  (-58.6,  -60.8) | -27.7  (23.5,22.6) | -66.5  (-48.9,  -51.9) |
| Oceania | 9.0  (7.7,10.6) | 3.8  (2.8,5.1) | 4.3  (3.2,5.6) | -57.8  (-63.6,  -51.9) | 13.2  (14.3,9.8) | -52.2  (-58.4,  -47.2) |
| Rest of South Asia | 44.7  (40.3,49.7) | 29.1  (27.6,30.6) | 26.3  (24.6,28.1) | -34.9  (-31.5,  -38.4) | -9.6  (-10.9,  -8.2) | -41.2  (-39.0,  -43.5) |
| Rest of Southern Africa | 48.3  (42.6,54.8) | 12.6  (10.9,14.4) | 34.0  (29.4,39.7) | -73.9  (-74.4,  -73.7) | 169.8  (169.7,175.7) | -29.6  (-31.0,  -27.6) |

# **Table 4. ‘Clean Mitigation’ Long Cook Time Over Time**

| **Scenario** |  | **Region** | **Both sexes** | | | | | |
| --- | --- | --- | --- | --- | --- | --- | --- | --- |
| **PAF (%) (UR)** | | | **Percent change (UR)** | | |
| **2015** | **2030** | **2050** | **2015-2030** | **2030-2050** | **2015–2050** |
| Canada | 11.0  (9.6,12.6) | 1.2  (0.05,2.4) | 2.6  (1.5,3.8) | | -89.1  (-99.5,-81.0) | | --- | | 116.7  (2900,58.3) | -76.4  (-84.4,-69.8) |
| USA | 11.2  (9.1,13.5) | 4.9  (3.7,6.4) | 6.0  (4.7,7.5) | -56.3  (-59.3,-52.6) | 22.5  (27.0,17.2) | -46.4  (-48.4,-44.4) |
| Mexico | 18.0  (15.6,20.5) | 10.8  (9.1,12.5) | 9.5  (8.0,11.2) | -40.0  (-41.7,-39.0) | -12.0  (-12.1,-10.4) | -47.2  (-48.7,-45.4) |
| Central America | 41.4  (36.9,46.9) | 8.4  (6.9,10.1) | 7.2  (5.8,8.7) | -79.7  (-81.3,-78.5) | -14.3  (-15.9,-13.9) | -82.6  (-84.3,-81.4) |
| Brazil | 29.3  (27.2,31.6) | 7.3  (6.0,8.9) | 6.7  (5.5,8.2) | -75.1  (-77.9,-71.8) | -8.2  (-8.3,-7.9) | -77.1  (-79.8,-74.0) |
| Rest of South America | 21.6  (19.6,23.6) | 10.8  (9.2,12.5) | 7.9  (6.5,9.4) | -50.0  (-53.1,-47.0) | -26.9  (-29.3,  -24.8) | -63.4  (-66.8,  -60.2) |
| Northern Africa | 27.8  (25.4,30.4) | 20.9  (19.0,23.0) | 22.4  (20.6,24.6) | -24.8  (-25.2,-24.3) | 7.2  (8.4,7.0) | -19.4  (-18.9,-19.1) |
| Western Africa | 49.8  (43.7,56.9) | 24.3  (22.2,26.6) | 22.4  (20.4,24.6) | -51.2  (-49.2,-53.3) | -7.8  (-8.1,-7.5) | -55.0  (-53.3,-56.8) |
| Eastern Africa | 48.4  (42.5,55.3) | 12.9  (11.2,14.7) | 14.6  (12.9,16.5) | -73.4  (-73.7,-73.5) | 13.2  (15.2,12.2) | -69.8  (-69.7,-70.2) |
| South Africa | 38.5  (34.6,42.8) | 7.1  (5.6,8.6) | 4.7  (3.5,6.1) | -81.6  (-83.8,-79.9) | -33.8  (-37.5,-29.1) | -87.8  (-89.9,-85.8) |
| Western Europe | 17.2  (14.8,19.8) | 8.4  (6.9,10.1) | 9.5  (7.9,11.2) | -51.2  (-53.4,-49.0) | 13.1  (14.5,10.9) | -44.8  (-46.6,-43.4) |
| Central Europe | 19.2  (17.0,21.5) | 9.6  (8.1,11.2) | 7.0  (5.7,8.4) | -50.0  (-52.4,-47.9) | -27.1  (-29.6,-25.0) | -63.5  (-66.5,-60.9) |
| Turkey | 29.2  (26.9,31.4) | 9.6  (8.2,11.3) | 9.5  (8.1,11.1) | -67.1  (-69.5,-64.0) | -1.0  (-1.2,-1.8) | -67.5  (-69.9,-64.7) |
| Ukraine Region | 32.1  (29.3,34.7) | 4.7  (3.4,6.0) | 3.1  (2.0,4.4) | -85.4  (-88.4,-82.7) | -34.0  (-41.2,-26.7) | -90.3  (-93.2,-87.3) |
| Central Asia | 25.8  (23.3,28.6) | 20.9  (18.9,22.9) | 20.0  (18.0,21.9) | -19.0  (-18.9,-19.9) | -2.4  (-4.8,-4.4) | -20.9  (-22.8,-23.4) |
| Russia Region | 10.3  (8.6,12.2) | 3.4  (2.3,4.7) | 2.5  (1.3,3.6) | -67.0  (-73.3,-61.5) | -26.5  (-43.5,-23.4) | -75.7  (-84.9,-70.5) |
| Middle East | 29.7  (27.2,32.6) | 22.7  (20.7,25.0) | 22.5  (20.4,24.7) | -23.6  (-23.9,-23.3) | -0.9  (-1.5,-1.2) | -24.2  (-25.0,-24.2) |
| India | 44.3  (40.1,49.2) | 27.8  (25.8,29.8) | 24.5  (22.5,26.5) | -37.3  (-35.7,-39.4) | -11.9  (-12.8,-11.1) | -44.7  (-43.9,-46.1) |
| Korea Region | 27.5  (25.0,30.1) | 17.4  (15.4,19.6) | 11.7  (10.1,13.6) | -36.7  (-38.4,-34.9) | -32.8  (-34.4,-30.6) | -57.5  (-59.6,-54.8) |
| China Region | 42.7  (40.0,45.5) | 26.7  (24.7,28.8) | 18.0  (16.0,20.0) | -37.5  (-38.3,-36.7) | -32.6  (-35.2,-30.6) | -57.9  (-60.0,-56.0) |
| Southeastern Asia | 47.4  (42.5,52.8) | 15.6  (13.8,17.6) | 12.7  (11.0,14.5) | -67.1  (-67.5,-66.7) | -18.6  (-20.3,-17.6) | -73.2  (-74.1,-72.5) |
| Indonesian Region | 40.4  (36.0,45.1) | 10.8  (9.2,12.8) | 10.6  (9.0,12.6) | -73.3  (-74.4,-71.6) | -1.9  (-2.2,-1.6) | -73.8  (-75.0,-72.1) |
| Japan | 17.9  (15.4,20.6) | 8.3  (6.8,9.9) | 5.9  (4.6,7.3) | -53.6  (-55.8,-51.9) | -43.4  (-32.4,-26.3) | -73.7  (-70.1,-64.6) |
| Oceania | 9.0  (7.7,10.6) | 3.4  (2.3,4.8) | 4.1  (3.0,5.5) | -62.2  (-70.1,-54.7) | -20.6  (30.4,14.6) | -54.4  (-61.0,-48.1) |
| Rest of South Asia | 44.7  (40.3,49.7) | 26.7  (24.7,28.6) | 24.1  (22.1,26.1) | -40.3  (-38.7,-42.5) | -9.7  (-10.5,-8.7) | -46.1  (-45.2,-47.5) |
| Rest of Southern Africa | 48.3  (42.6,54.8) | 3.0  (1.9,4.2) | 3.5  (2.4,4.8) | -93.8  (-95.5,-92.3) | 16.7  (26.3,14.3) | -92.8  (-94.4,-91.2) |

# **Table 5. End-Of-Pipe Long Cook Time Over Time**

| **Scenario** |  | **Region** | **Both sexes** | | | | | |
| --- | --- | --- | --- | --- | --- | --- | --- | --- |
| **PAF (%) (UR)** | | | **Percent change (UR)** | | |
| **2015** | **2030** | **2050** | **2015-2030** | **2030-2050** | **2015–2050** |
| Canada | 11.0  (9.6,12.6) | 4.0  (2.9,5.1) | 2.2  (1.1,3.4) | -63.6  (-69.8,  -59.5) | -45.0  (-62.1,  -33.3) | -80.0  (-88.5,-73.0) |
| USA | 11.2  (9.1,13.5) | 5.2  (4.0,6.7) | 5.4  (4.1,6.8) | -53.6  (-56.0,-50.4) | 3.8  (2.5,1.5) | -51.8  (-54.9,-49.6) |
| Mexico | 18.0  (15.6,20.5) | 16.5  (15.0,18.1) | 13.9  (12.1,15.8) | -8.3  (-3.8,-11.7) | -15.8  (19.3,-11.7) | -22.8  (-22.4,-22.9) |
| Central America | 41.4  (36.9,46.9) | 27.3  (24.4,30.7) | 17.2  (15.7,18.9) | -34.1  (-33.9,-34.5) | -37.0  (-35.7,-38.4) | -58.5  (-57.5,-59.7) |
| Brazil | 29.3  (27.2,31.6) | 20.4  (18.9,21.9) | 11.3  (10.0,12.8) | -30.4  (-30.5,-30.7) | -44.6  (-47.1,-41.6) | -61.4  (-63.2,-59.5) |
| Rest of South America | 21.6  (19.6,23.6) | 16.8  (15.1,18.5) | 16.1  (14.3,18.0) | -22.2  (-23.0,-21.6) | -4.2  (-5.3,-2.7) | -25.5  (-27.0,-23.7) |
| Northern Africa | 27.8  (25.4,30.4) | 21.5  (19.6,23.6) | 22.7  (20.8,24.8) | -22.7  (-22.8,-22.4) | 5.6  (6.1,5.1) | -18.3  (-18.1,-18.4) |
| Western Africa | 49.8  (43.7,56.9) | 42.3  (37.4,48.3) | 33.8  (31.3,36.8) | -15.1  (-14.4,-15.1) | -20.1  (-16.3,-23.8) | -32.1  (-28.4,-35.3) |
| Eastern Africa | 48.4  (42.5,55.3) | 39.2  (34.6,44.4) | 32.4  (29.9,35.0) | -19.0  (-18.6,-19.7) | -17.3  (-13.6,-21.2) | -33.1  (-29.6,-36.7) |
| South Africa | 38.5  (34.6,42.8) | 27.4  (24.7,30.4) | 11.2  (10.0,12.5) | -28.8  (-28.6,-28.9) | -59.1  (-59.5,-58.9) | -70.9  (-71.1,-70.8) |
| Western Europe | 17.2  (14.8,19.8) | 8.5  (7.0,10.2) | 8.5  (7.0,10.2) | -50.6  (-52.7,  -48.5) | 0  (0,0) | -50.6  (-52.7,-48.5) |
| Central Europe | 19.2  (17.0,21.5) | 12.3  (10.9,13.7) | 8.6  (7.2,10.1) | -35.9  (-34.4,-45.6) | -30.1  (-34.6,-17.1) | -55.2  (-57.1,-54.9) |
| Turkey | 29.2  (26.9,31.4) | 11.6  (10.1,13.3) | 11.9  (10.3,13.7) | -60.3  (-62.5,-57.6) | 2.6  (2.0,3.0) | -59.2  (-61.7,-56.4) |
| Ukraine Region | 32.1  (29.3,34.7) | 12.7  (11.6,14.0) | 5.9  (4.5,7.3) | -60.4  (-60.4,-59.7) | -53.5  (-61.2,-47.9) | -81.6  (-84.6,-79.0) |
| Central Asia | 25.8  (23.3,28.6) | 22.1  (20.1,24.1) | 22.7  (20.7,24.7) | -14.3  (-13.7,-16.1) | 2.7  (3.0,2.9) | -12.0  (-11.2,-13.6) |
| Russia Region | 10.3  (8.6,12.2) | 4.5  (3.3,5.8) | 4.0  (2.9,5.3) | -56.3  (-59.3,-52.5) | -11.1  (-17.1,-8.6) | -61.2  (-66.3,-56.6) |
| Middle East | 29.7  (27.2,32.6) | 23.8  (21.7,26.1) | 24.3  (22.3,26.7) | -19.9  (-20.2,-19.7) | 2.1  (2.8,2.3) | -18.2  (-18.0,-17.8) |
| India | 44.3  (40.1,49.2) | 39.3  (36.1,42.8) | 33.1  (31.3,34.8) | -11.3  (-10.0,-13.0) | -15.8  (-13.3,-18.7) | -25.3  (-21.9,-29.3) |
| Korea Region | 27.5  (25.0,30.1) | 20.0  (18.0,22.1) | 15.7  (13.8,17.9) | -27.3  (-28.0,-26.7) | -21.5  (-23.3,-18.6) | -42.9  (-44.8,-40.3) |
| China Region | 42.7  (40.0,45.5) | 32.9  (31.2,34.7) | 26.2  (24.4,28.1) | -23.0  (-22.0,-23.7) | -20.4  (-21.8,-19.0) | -38.6  (-39.0,-38.2) |
| Southeastern Asia | 47.4  (42.5,52.8) | 34.8  (31.6,38.4) | 25.5  (23.8,27.4) | -26.6  (-25.6,-27.3) | -26.7  (-24.7,-28.6) | -46.2  (-44.0,-48.1) |
| Indonesian Region | 40.4  (36.0,45.1) | 30.8  (27.8,34.0) | 23.1  (21.4,24.9) | -23.8  (-22.8,-24.6) | -25.0  (-23.0,-26.8) | -42.8  (-40.6,-44.8) |
| Japan | 17.9  (15.4,20.6) | 9.6  (8.0,11.3) | 7.6  (6.1,9.1) | -46.4  (-48.1,-44.9) | -20.8  (-13.7,-19.5) | -57.5  (-55.2,-55.6) |
| Oceania | 9.0  (7.7,10.6) | 4.7  (3.6,5.9) | 3.8  (2.7,5.2) | -47.8  (-53.2,-44.3) | -19.1  (-25.0,-11.9) | -57.8  (-64.9,-50.9) |
| Rest of South Asia | 44.7  (40.3,49.7) | 33.7  (31.8,35.6) | 30.6  (28.8,32.3) | -24.6  (-21.1,-28.4) | -9.2  (-9.4,-9.3) | -31.5  (-28.5,-35.0) |
| Rest of Southern Africa | 48.3  (42.6,54.8) | 43.3  (37.9,49.8) | 34.4  (30.0,39.9) | -10.4  (-11.0,-9.1) | -20.6  (-20.8,-19.9) | -28.8  (-29.6,-27.2) |

# **Table 6.Waste Reduction Long Cook Time Over Time**

| **Scenario** |  | **Region** | **Both sexes** | | | | | |
| --- | --- | --- | --- | --- | --- | --- | --- | --- |
| **PAF (%) (UR)** | | | **Percent change (UR)** | | |
| **2015** | **2030** | **2050** | **2015-2030** | **2030-2050** | **2015–2050** |
| Canada | 11.0  (9.6,12.6) | 4.1  (3.1,5.2) | 2.2  (1.1,3.4) | -62.4  (-67.9,  -59.0) | -46.6  (-64.6,  -34.6) | -79.9  (-88.6,  -73.2) |
| USA | 11.2  (9.1,13.5) | 5.4  (4.1,6.8) | 5.0  (3.8,6.4) | -52.1  (-55.0,  -49.4) | -6.4  (-7.5,  -6.0) | -55.2  (-58.4,  -52.4) |
| Mexico | 18.0  (15.6,20.5) | 16.6  (15.1,18.1) | 13.7  (11.9,15.5) | -7.9  (-3.3,  -11.8) | -17.4  (-20.8,  -14.2) | -23.9  (-23.4,  -24.4) |
| Central America | 41.4  (36.9,46.9) | 27.4  (24.5,30.8) | 16.2  (14.7,17.8) | -34.0  (-33.8,  -34.4) | -40.8  (-39.8,  -42.2) | -60.9  (-60.1,  -62.1) |
| Brazil | 29.3  (27.2,31.6) | 20.3  (18.9,21.8) | 9.1  (8.0,10.5) | -30.8  (-30.7,  -30.9) | -55.0  (-57.7,  -52.1) | -68.9  (-70.7,  -66.9) |
| Rest of South America | 21.6  (19.6,23.6) | 16.8  (15.1,18.5) | 15.1  (13.4,16.9) | -22.0  (-22.6,  -21.6) | -10.5  (-11.7,  -9.0) | -30.2  (-31.7,  -28.7) |
| Northern Africa | 27.8  (25.4,  30.4) | 21.5  (19.6,23.6) | 22.4  (20.6,24.5) | -22.5  (-22.8,  -22.5) | -4.3  (-4.9,  -3.7) | -19.2  (-19.0,  -19.6) |
| Western Africa | 49.8  (43.7,56.9) | 42.4  (37.5,48.4) | 33.7  (31.2,36.7) | -14.9  (-14.3,  -15.0) | -20.3  (-16.8,  -24.2) | -32.2  (-28.7,  -35.6) |
| Eastern Africa | 48.4  (42.5,55.3) | 39.4  (34.8,44.6) | 32.4  (29.9,35.0) | -18.6  (-18.2,  -19.3) | -17.8  (-14.1,  -21.4) | -33.1  (-29.7,  -36.6) |
| South Africa | 38.5  (34.6,42.8) | 27.6  (24.9,30.6) | 11.0  (9.8,12.3) | -28.2  (-28.1,  -28.6) | -60.0  (-60.5,  -59.7) | -71.3  (-71.6,  -71.2) |
| Western Europe | 17.2  (14.8,19.8) | 9.7  (8.1,11.5) | 8.4  (6.9,10.0) | -43.5  (-45.4,  -42.1) | -13.3  (-14.2,  -12.5) | -51.0  (-53.1,  -49.3) |
| Central Europe | 19.2  (17.0,21.5) | 13.2  (11.8,14.7) | 8.1  (6.8,9.5) | -31.0  (-30.4,  -31.6) | -38.7  (-42.4,  -35.1) | -57.7  (-59.9,  -55.6) |
| Turkey | 29.2  (26.9,31.4) | 12.6  (11.0,14.3) | 10.7  (9.2,12.4) | -56.9  (-59.0  , -54.4) | -15.1  (-17.1,  -13.5) | -63.4  (-66.0,  -60.5) |
| Ukraine Region | 32.1  (29.3,34.7) | 12.9  (11.7,14.2) | 5.0  (3.7,6.3) | -59.8  (-59.9,  -59.2) | -61.5  (-68.4,  -55.3) | -84.5  (-87.3,  -81.8) |
| Central Asia | 25.8  (23.3,28.6) | 22.7  (20.7,24.7) | 21.9  (19.9,23.9) | -12.0  (-11.2,  -13.5) | -3.7  (-3.9,  -3.4) | -15.3  (-14.7,  -16.5) |
| Russia Region | 10.3  (8.6,12.2) | 4.9  (3.7,6.2) | 3.5  (2.4,4.7) | -52.5  (-56.9,  -48.7) | -27.7  (-34.9,  -24.0) | -65.6  (-72.0,  -61.0) |
| Middle East | 29.7  (27.2,32.6) | 24.3  (22.3,26.7) | 24.5  (22.5,26.8) | -18.1  (-18.1,  -18.2) | 0.8  (1.0,0.6) | -17.4  (-17.3,  -17.7) |
| India | 44.3  (40.1,49.2) | 39.4  (36.1,42.9) | 32.3  (30.6,33.9) | -11.1  (-9.8,  -12.7) | -18.1  (-15.4,  -20.9) | -27.2  (-23.7,  -31.0) |
| Korea Region | 27.5  (25.0,30.1) | 20.0  (18.0,22.2) | 16.4  (14.5,18.5) | -27.3  (-28.1,  -26.5) | -18.0  (-19.4,  -16.4) | -40.4  (-42.0,  -38.6) |
| China Region | 42.7  (40.0,45.5) | 33.4  (36.1,42.9) | 25.9  (24.1,27.8) | -21.9  (-20.8,  -22.8) | -22.4  (-23.9,  -21.0) | -39.3  (-39.7,  -39.0) |
| Southeastern Asia | 47.4  (42.5,52.8) | 34.8  (31.6,38.4) | 23.2  (21.5,25.0) | -26.7  (-25.6,  -27.3) | -33.2  (-32.1,  -34.7) | -51.0  (-49.5,  -52.5) |
| Indonesian Region | 40.4  (36.0,45.1) | 30.5  (27.4,33.7) | 22.3  (20.6,24.0) | -24.7  (-23.9,  -25.1) | -26.9  (-24.7,  -28.7) | -45.0  (-42.7,  -46.6) |
| Japan | 17.9  (15.4,20.6) | 9.6  (8.1,11.3) | 7.7  (6.3,9.2) | -46.3  (-47.7,  -45.4) | -19.9  (-22.1,  -18.3) | -57.0  (-59.2,  -55.4) |
| Oceania | 9.0  (7.7,10.6) | 4.7  (3.7,5.9) | 3.5  (2.4,4.8) | -48.2  (-52.3,  -43.8) | -25.9  (-34.2,  -19.9) | -61.6  (-68.6,  -55.0) |
| Rest of South Asia | 44.7  (40.3,49.7) | 33.7  (31.9,35.7) | 29.6  (27.9,31.4) | -24.6  (-21.0,  -28.1) | -12.1  (-12.4,  -12.2) | -33.7  (-30.7, -36.9) |
| Rest of Southern Africa | 48.3  (42.6,54.8) | 43.8  (38.2,50.6) | 34.3  (29.8,39.9) | -9.3  (-10.4,  -7.6) | -21.7  (-21.9,  -21.2) | -29.0  (-30.0,  -27.1) |

# **Table 7. All Long Cook Time Over Time**

| **Scenario** |  | **Region** | **Both sexes** | | | | | |
| --- | --- | --- | --- | --- | --- | --- | --- | --- |
| **PAF (%) (UR)** | | | **Percent change (UR)** | | |
| **2015** | **2030** | **2050** | **2015-2030** | **2030-2050** | **2015–2050** |
| Canada | 11.0  (9.6,12.6) | 0.92  (-0.30,2.04) | 2.2  (1.0,3.3) | -91.6  (-103.1,  -83.8) | 137.7  (-447.5,  63.7) | -80.3  (-89.2,  -73.5) |
| USA | 11.2  (9.1,13.5) | 4.49  (3.3,5.9) | 4.7  (3.5,6.1) | -59.8  (-63.8,  -56.3) | 5.0  (6.8,3.6) | -57.8  (-61.4,  -54.8) |
| Mexico | 18.0  (15.6,20.5) | 9.7  (8.1,11.4) | 9.5  (8.0,11.2) | -46.4  (-48.1, -44.6) | -1.3  (-1.2,  -1.4) | -47.0  (-48.7,  -45.4) |
| Central America | 41.4  (36.9,  46.9) | 8.3  (6.8,9.9) | 6.2  (4.9,7.6) | -80.0  (-81.5,  -78.8) | -25.6  (-28.8,  -23.2) | -85.1  (-86.9,  -83.7) |
| Brazil | 29.3  (27.2-31.6) | 6.4  (5.1-7.9) | 3.8  (2.7,5.1) | -78.1  (-81.5,  -78.8) | -40.1  (-46.7,  -34.9) | -86.9  (-89.9,  -83.7) |
| Rest of South America | 21.6  (19.6-23.6) | 10.8  (9.2-12.5) | 5.9  (4.6,7.4) | -50.0  (-53.1,  -47.0) | -45.0  (-49.5,  -41.3) | -72.5  (-76.3,  -68.9) |
| Northern Africa | 27.8  (25.4-30.4) | 20.9  (19.0-23.0) | 22.4  (20.6,  24.5) | -24.8  (-25.3,  -24.5) | 7.4  (8.4,6.5) | -19.2  (-19.0,  -19.6) |
| Western Africa | 49.8  (43.7-56.9) | 23.8  (21.7-26.1) | 21.9  (19.8,24.0) | -52.2  (-50.4,  -54.2) | -8.1  (-8.8,  -7.8) | -53.1  (-55.4,  -71.7) |
| Eastern Africa | 48.4  (42.5-55.3) | 12.9  (11.2-14.7) | 13.7  (12.0,  15.6) | -73.3  (-73.6,  -73.4) | 6.2  (7.1,  5.7) | -71.7  (-71.7,  -71.8) |
| South Africa | 38.5  (34.6-42.8) | 6.3  (5.0-7.8) | 4.4  (3.3,5.8) | -83.7  (-85.7,  -81.8) | -29.7  (-34.4,  -26.1) | -88.5  (-90.6,  -86.6) |
| Western Europe | 17.2  (14.8-19.8) | 8.0  (6.6-9.7) | 8.1  (6.6,9.7) | -53.2  (-55.6,  -51.2) | 0.2  (0.5,0.04) | -53.1  (-55.4,  -51.1) |
| Central Europe | 19.2  (17.0-21.5) | 7.9  (6.6-9.4) | 4.8  (3.7,6.1) | -58.7  (-61.3,  -56.2) | -39.3  (-44.3,  -35.4) | -74.9  (-78.5,  -71.7) |
| Turkey | 29.2  (26.9-31.4) | 8.4  (7.1-10.0) | 7.4  (6.0,8.8) | -71.0  (-73.7,  -68.0) | -12.9  (-14.6,  -12.0) | -74.8  (-77.6,  -71.9) |
| Ukraine Region | 32.1  (29.3-34.7) | 3.9  (2.7-5.3) | 1.6  (0.47,2.7) | -87.7  (-90.8,  -84.8) | -59.4  (-82.6,  -47.9) | -95.0  (-98.4,  -92.1) |
| Central Asia | 25.8  (23.3-28.6) | 20.9  (18.9-22.9) | 19.3  (17.3,21.3) | -19.1  (-19.0,  -19.8) | -7.5  (-8.1,  -7.2) | -25.2  (-25.6,  -25.6) |
| Russia Region | 10.3  (8.6-12.2) | 3.0  (1.8-4.2) | 1.7  (0.63,2.8) | -71.0  (-78.6,  -65.7) | -42.7  (-65.7,  -33.4) | -83.4  (-92.6,  -77.2) |
| Middle East | 29.7  (27.2-32.6) | 22.7  (20.7-25.0) | 22.5  (20.4,24.7) | -23.6  (-23.9,  -23.3) | -1.2  (-1.1,  -1.2) | -24.5  (-24.8,  -24.2) |
| India | 44.3  (40.1-49.2) | 25.7  (23.7-27.7) | 17.8  (16.0,19.8) | -42.0  (-40.8,  -43.6) | -30.7  (-32.7,  -28.5) | -59.8  (-60.2,  -59.7) |
| Korea Region | 27.5  (25.0-30.1) | 16.6  (14.6-18.7) | 10.7  (9.1,12.5) | -39.7  (-41.6,  -37.9) | -35.5  (-37.8,  -33.2) | -61.1  (-63.7,  -58.5) |
| China Region | 42.7  (40.0-45.5) | 25.8  (23.8-27.9) | 18.0  (16.0,20.0) | -39.5  (-40.5,  -38.8) | -30.5  (-32.6,  -28.4) | -58.0  (-58.0,  -59.9) |
| Southeastern Asia | 47.4  (42.5-52.8) | 14.7  (12.9-16.7) | 7.6  (6.2,9.1) | -68.9  (-69.6,  -68.4) | -48.6  (-51.8,  -45.5) | -84.0  (-85.3,  -82.8) |
| Indonesian Region | 40.4  (36.0-45.1) | 10.8  (9.2-12.8) | 9.5  (8.0,11.4) | -73.3  (-74.6,  -71.7) | -11.6  (-12.5,  -10.8) | -76.4  (-77.8,  -74.7) |
| Japan | 17.9  (15.4-20.6) | 7.9  (6.5-9.5) | 5.6  (4.4,7.0) | -55.7  (-58.0,  -54.1) | -29.0  (-32.2,  -26.1) | -68.6  (-71.6,  -66.1) |
| Oceania | 9.0  (7.7-10.6) | 3.3  (2.2-4.6) | 2.8  (1.7,4.0) | -63.6  (-71.3,  -56.5) | -15.1  (-21.5,  -12.2) | -69.1  (-77.5,  -61.6) |
| Rest of South Asia | 44.7  (40.3-49.7) | 24.8  (22.8-26.9) | 17.1  (15.2,19.1) | -44.5  (-43.4,  -45.9) | -31.0  (-33.5,  -29.1) | -61.7  (-62.4,  -61.6) |
| Rest of Southern Africa | 48.3  (42.6-54.8) | 2.5  (1.4-3.7) | 4.5  (3.4,5.9) | -94.8  (-96.7,  -93.2) | 80.8  (137.0,  58.2) | -90.6  (-92.1,  -89.2) |

## Supplementary Results

## Supplementary Table 1. SSP2 2015 Relative to SSP2 2050 PM2.5 Exposure Absolute Values

| **2015** | | | **2050** | | | **2050-2015** |
| --- | --- | --- | --- | --- | --- | --- |
| **IMAGE Region** | **Indoor PM2.5 Exposure** | **Outdoor PM2.5 Exposure** | **Total PM2.5 Exposure** | **Indoor PM2.5 Exposure** | **Outdoor PM2.5 Exposure** | **Total PM2.5 Exposure** | **Delta of Total Exposure** |
| Canada | 35.6274 | 6.475 | 42.1024 | 9.558720007 | 5.6 | 15.15872 | -26.94368 |
| United States | 8.111554 | 10.543 | 18.65455 | 11.29426212 | 7.681 | 18.97526 | 0.32071 |
| Mexico | 61.10688 | 16.87 | 77.97688 | 22.872 | 15.65 | 38.522 | -39.45488 |
| Rest of Central America | 174.0432 | 11.154 | 185.1972 | 73.355832 | 11.162 | 84.51783 | -100.67937 |
| Brazil | 52.1592 | 12.606 | 64.7652 | 20.37126149 | 10.412 | 30.78326 | -33.98194 |
| Rest of South America | 40.35388 | 15.6268 | 55.98068 | 20.04937504 | 17.358248 | 37.40762 | -18.57306 |
| North Africa | 36.4788 | 28.61599 | 65.09479 | 19.32360034 | 26.866016 | 46.18962 | -18.90517 |
| West Africa | 244.6475 | 28.565 | 273.2125 | 144.7130142 | 33.228 | 177.941 | -95.2715 |
| East Africa | 230.6441 | 12.987 | 243.6311 | 164.85252 | 33.942 | 198.7945 | -44.8366 |
| South Africa | 136.4213 | 14.017 | 150.4383 | 37.2484056 | 8.954 | 46.20241 | -104.23589 |
| Western European Union | 13.23786 | 15.59075 | 28.82861 | 16.16346001 | 10.537763 | 26.70122 | -2.12739 |
| Central European Union | 28.14126 | 15.54699 | 43.68825 | 15.68544005 | 10.215082 | 25.90052 | -17.78773 |
| Turkey | 78.85933 | 17.826 | 96.68533 | 16.91525794 | 13.583 | 30.49826 | -66.18707 |
| Ukraine | 75.8358 | 11.501 | 87.3368 | 10.49458829 | 8.16 | 18.65459 | -68.68221 |
| Central Asia | 17.04 | 26.72206 | 43.76206 | 16.562934 | 26.63255 | 43.19548 | -0.56658 |
| Russia | 12.0588 | 9.116316 | 21.17512 | 6.517500284 | 6.907305 | 13.42481 | -7.75031 |
| Middle East | 22.0044 | 34.42993 | 56.43433 | 21.48420004 | 30.997589 | 52.48179 | -3.95254 |
| India | 195.6647 | 46.059 | 241.7237 | 83.21042574 | 51.826 | 135.0364 | -106.6873 |
| Korea | 25.73206 | 28.361 | 54.09306 | 19.76028 | 17.853 | 37.61328 | -16.47978 |
| China | 117.1507 | 54.0477 | 171.1984 | 41.45334571 | 31.473662 | 72.92701 | -98.27139 |
| South East Asia | 165.8437 | 23.12205 | 188.9657 | 94.98501072 | 19.014885 | 113.9999 | -74.9658 |
| Indonesia | 162.5032 | 12.205 | 174.7082 | 82.0506 | 16.832 | 98.8826 | -75.8256 |
| Japan | 10.9266 | 16.52 | 27.4466 | 15.52764082 | 9.548 | 25.07564 | -2.37096 |
| Oceania | 18.24 | 6.320894 | 24.56089 | 9.526380236 | 6.507493 | 16.03387 | -8.52702 |
| Rest of South Asia | 185.3148 | 41.35 | 226.6648 | 57.8166 | 42.713 | 100.5296 | -126.1352 |
| Rest of South Africa | 217.3915 | 6.573 | 223.9645 | 208.368192 | 8.557 | 216.9252 | -7.0393 |
| Global Average | 90.98226 | 20.10583 | 111.0881 | 47.6984941 | 18.54659973 | 66.24509383 | -44.84 |

## Supplementary Table 1 b. Delta Exposure of SSP2 2015 To SSP2 2050

| Δ **Ambient** **PM2.5 Exposure** | **Δ Indoor PM2.5 Exposure** |
| --- | --- |
| **IMAGE Region** |  |  |
| Canada | -0.875 | -26.06867999 |
| United States | -2.862 | 3.18270812 |
| Mexico | -1.22 | -38.23488 |
| Rest of Central America | 0.008 | -100.687368 |
| Brazil | -2.194 | -31.78793851 |
| Rest of South America | 1.731448 | -20.30450496 |
| North Africa | -1.749974 | -17.15519966 |
| West Africa | 4.663 | -99.9344858 |
| East Africa | 20.955 | -65.79158 |
| South Africa | -5.063 | -99.1728944 |
| Western European Union | -5.052987 | 2.92560001 |
| Central European Union | -5.331908 | -12.45581995 |
| Turkey | -4.243 | -61.94407206 |
| Ukraine | -3.341 | -65.34121171 |
| Central Asia | -0.08951 | -0.477066 |
| Russia | -2.209011 | -5.541299716 |
| Middle East | -3.432341 | -0.52019996 |
| India | 5.767 | -112.4542743 |
| Korea | -10.508 | -5.97178 |
| China | -22.574038 | -75.69735429 |
| South East Asia | -4.107165 | -70.85868928 |
| Indonesia | 4.627 | -80.4526 |
| Japan | -6.972 | 4.60104082 |
| Oceania | 0.186599 | -8.713619764 |
| Rest of South Asia | 1.363 | -127.4982 |
| Rest of South Africa | 1.984 | -9.023308 |
| Global Average | -0.875 | -43.2837659 |

## Supplementary Table 2. 2050 Mitigation with Increased Access Energy Relative to 2050 Mitigation with Only Clean Energy

| **2050** | | |
| --- | --- | --- |
| **IMAGE Region** | **Total PM2.5 Exposure with Mitigation and Increased Access** | **Total PM2.5 Exposure with Mitigation and Only Clean Energy Access** | **Δ PM2.5 Exposure between the two Scenarios** |
| Canada | 12.72235986 | 10.32024465 | -2.402115208 |
| United States | 16.33459538 | 13.97824465 | -2.356350733 |
| Mexico | 30.28018974 | 19.41984465 | -10.86034509 |
| Rest of Central America | 78.81329374 | 15.66944465 | -63.14384909 |
| Brazil | 26.04319723 | 15.01344465 | -11.02975258 |
| Rest of South America | 20.81856406 | 16.44224465 | -4.376319413 |
| North Africa | 36.32458047 | 44.39424465 | 8.069664184 |
| West Africa | 164.9741997 | 43.91424465 | -121.0599551 |
| East Africa | 168.6838769 | 26.95424465 | -141.7296323 |
| South Africa | 40.57607414 | 12.52224465 | -28.05382949 |
| Western European Union | 24.08943818 | 18.23424465 | -5.855193527 |
| Central European Union | 21.61516559 | 15.30624465 | -6.308920944 |
| Turkey | 22.30625125 | 18.58624465 | -3.720006603 |
| Ukraine | 12.01869384 | 10.79424465 | -1.224449191 |
| Central Asia | 29.34060696 | 37.53024465 | 8.189637694 |
| Russia | 7.789147781 | 10.20224465 | 2.413096869 |
| Middle East | 32.38470059 | 44.28224465 | 11.89754406 |
| India | 100.6889696 | 50.97024465 | -49.71872493 |
| Korea | 26.66552291 | 21.25824465 | -5.407278255 |
| China | 62.25173173 | 33.64224465 | -28.60948708 |
| South East Asia | 103.2688511 | 23.00224465 | -80.26660648 |
| Indonesia | 90.95998258 | 20.92224465 | -70.03773793 |
| Japan | 21.55163807 | 13.93024465 | -7.621393417 |
| Oceania | 13.20035526 | 11.96224465 | -1.238110612 |
| Rest of South Asia | 69.47040918 | 49.57824465 | -19.89216453 |
| Rest of South Africa | 200.7640804 | 11.25824465 | -189.5058358 |
| Global Average | 55.15140293 | 23.46493696 | -31.68646598 |

**Precursor Emissions Analysis**

**2050 emissions**

BC OC Sox Nox VOC

SSP2 7.0 64.1 64.9 142.1 178.8

SSP2_CP 6.9 65.2 62.3 136.9 177.7

SSP2_SPA0_19I_CP 5.1 33.6 13.7 63.4 103.1

EnAccess 6.1 62.0 64.8 142.2 167.8

EndPipe 6.2 62.0 61.2 134.2 162.5

WasteReduc 6.6 61.1 64.6 140.0 174.8

All 2.9 26.4 12.9 58.6 75.4
